# Supplementary material for: HESS Opinions: Chemical transport modeling in subsurface hydrological systems – Space, time, and the holy grail of “upscaling”
Source: Copernicus journal article supplement (doi:10.5194/hess-2021-537), 2021-11-02
Supplement: Supplementary file [file hess-2021-537-RC2-supplement.pdf]

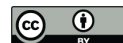

# HESS Opinions: Chemical transport modeling in subsurface hydrological systems – Space, time, and the holy grail of “upscaling”

Brian Berkowitz<sup>1</sup>

<sup>1</sup>Department of Earth and Planetary Sciences, Weizmann Institute of Science, Rehovot 7610001, Israel

Correspondence to: Brian Berkowitz (brian.berkowitz@weizmann.ac.il)

## Abstract.

Extensive efforts over decades have focused on quantifying chemical transport in subsurface geological formations, from microfluidic laboratory cells to aquifer field scales. Outcomes of these efforts have remained largely unsatisfactory, however, largely because domain heterogeneity (in terms of, e.g., porosity, hydraulic conductivity, geochemical properties) is present over multiple length scales, and “unresolved”, practically unmeasurable heterogeneities and preferential pathways arise at virtually every scale. While *spatial* averaging approaches are effective when considering overall fluid flow – wherein pressure propagation is essentially instantaneous and the system is “well mixed” – purely *spatial* averaging approaches are far less effective for chemical transport, essentially because well-mixed conditions do not prevail. We assert here that an explicit accounting of *temporal* information, under uncertainty, is an additional, but *fundamental*, component in an effective modeling formulation. As an outcome, we further assert that “upscaling” of chemical transport equations – in the sense of attempting to develop and apply chemical transport equations at large (length) scales, based on measurements and model parameter values obtained at significantly smaller length scales – is very much a holy grail. Rather, we maintain that it is necessary to formulate, calibrate and apply models using measurements at similar scales of interest, in both space and time.

**Keywords:** Preferential flow, anomalous transport, numerical modeling, measurements

IN CONTEMPORARY PARLANCE HOLY GRAIL IS SOMETHING USED TO REFER TO AN ATTAINABLE OBJECTIVE OR WORK. NOT AN IDEAL CHASE OF TERMS.

MEANING HERE NOT CLEAR: TRY TO ADDITIONAL

MANY OF US DID NOT EXPECT MORE THAN WAS FOUND, SO ARE NOT UNSATISFIED, BUT RATHER APPRECIATING NATURE'S COMPLEXITY.

DOES THIS MEAN A MYTHICAL AND UNATTAINABLE GOAL, OR A VAGUE OBJECTIVE? I GUESS THE FORMER.

KEY POINT: IF EVERY MODEL NEEDS TO BE CALIBRATED @ ALL SCALES, IS THE MODELING EXERCISE FUTILE?

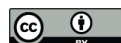

## 32 1 Introduction

### 34 1.1 Background

36 There have been extensive efforts over the last ~60 years to model and otherwise quantify fluid  
 37 flow and chemical (contaminant) transport in soil ~~layers~~ and subsurface geological formations,  
 38 from millimeter-size, laboratory microfluidics cells to aquifer field scales extending to hundreds  
 39 of meters and even tens of kilometers.

40 Soil ~~layers~~ and subsurface formations ~~can~~ exhibit significant heterogeneity, in terms of domain  
 41 characteristics such as porosity, hydraulic conductivity, structure, and biogeochemical properties  
 42 (mineral and organic matter content). However, recognition that effects of heterogeneity over  
 43 multiple length scales, with “unresolved” practically unmeasurable heterogeneities arising at  
 44 every length scale (from pore to field) cannot be simply “averaged out” has become broadly  
 45 accepted only more recently. Indeed, much research on flow and transport in porous media, dating  
 46 particularly from ~1950-1990, but also essentially to date, has been based on the search for length  
 47 scales at which one can define a “representative elementary volume”, or otherwise-named  
 48 “averaging volume” above which variability in fluid and chemical properties become constant. In  
 49 this context, too, many varieties of homogenization, volume averaging, effective medium, and  
 50 stochastic continuum theories have been developed in an extensive literature. These methods  
 51 allowed formulation of continuum-scale, generally Eulerian, partial differential equations to  
 52 quantify (“model”) fluid flow and chemical transport, which were then applied in the soil and  
 53 groundwater literature at length scales ranging from millimeters to full aquifers. While originally  
 54 deterministic in character, a variety of stochastic formulations, and use of Monte Carlo numerical  
 55 simulation techniques, introduced from the 1980s, enabled analysis of uncertainties in input  
 56 parameters such as hydraulic conductivity.

57 However, while analysis of fluid flow using these methods has proven relatively effective,  
 58 quantification of chemical transport, and an accounting of associated (biogeo)chemical reactions  
 59 in cases of reactive chemical species and/or host porous media, has remained largely  
 60 unsatisfactory. We discuss the reasons for this, in detail, in the sections below. Briefly, the  
 61 overarching reason for these successes and failures is that *spatial* averaging approaches are  
 62 effective when considering overall fluid flow rates and quantities, wherein pressure propagation is  
 63 essentially instantaneous and the system is “well mixed” (because mixing of water “parcels” is  
 64 functionally irrelevant). However, purely *spatial* averaging approaches are far less effective for  
 65 chemical transport, essentially because well-mixed conditions do not prevail, and spatial averaging  
 66 is inadequate; here, an explicit, additional accounting of *temporal* effects is required.

67 The focus of the current contribution is on modeling conservative chemical transport in  
 68 geological media. In terms of modeling, one can delineate two main types of scenarios: (i) *pore-*  
 69 *scale modeling* in relatively small domains, with a detailed (and specified) pore structure, and (ii)  
 70 *continuum-scale modeling* in porous media domains, that average pore space and solid phases at  
 71 scales from laboratory flow cells to field-scale plots and aquifers. Case (i) requires, e.g., Navier-

“work”

“common GSI involves this” “it is as periodic.”

NOT Really, unsatisfactory for some, but fine for many applications.

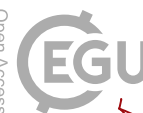

REALLY LIMIT THE UTILITY/INTEREST OF THIS PAPER. SCIENCE IS NOT A ONE-TEAM EFFORT, BUT RATHER A COMMUNITY OF DISCOVERY. KEY POINTS, SUCH AS IMPORTANCE OF SCALING IN TIME/SPACE, SHOULD BE A PART OF THE COMMUNITY.

Stokes or Stokes equations solutions for the underlying flow field, coupled with solution of a local (e.g., advection-diffusion) equation for transport, while Case (ii) requires Darcy (or related) equation solutions for the underlying flow field, coupled with solution of a governing transport equation for chemical transport. *Note:* here and throughout, we shall use the terms “continuum level” and “continuum scale” in reference to case (ii) scenarios, and “pore-scale” to refer to Case (i) scenarios, although we recognize, too, that pore-scale Navier-Stokes and advection-diffusion equations are continuum partial differential equations.

**Disclaimer:** Here and throughout this contribution, the overview comments and references to existing philosophies, methodologies and interpretations are written, largely, in broad terms, without (necessarily limited numbers of) citations selected from the vast literature. This approach is taken with a clear recognition and respect for the body of literature that has driven our field forward over the last decades, but with the express desire to avoid any risk of unintentionally alienating colleagues and/or misrepresenting aspects of relevant studies. *As an Opinion contribution, and with length considerations in mind, there is no attempt to provide an exhaustive listing and description of relevant literature.*

## 1.2 Assertions

The pioneering paper of Gelhar and Axness (1983) focused on quantifying conservative chemical transport at the continuum level. They expressed heterogeneity-induced chemical spreading in terms of the (longitudinal) macrodispersion coefficient – as it appears in the classical (macroscopically 1d) advection-dispersion equation – with knowledge of the variance and correlation length of the log-hydraulic conductivity field and the mean, ensemble-averaged fluid velocity. The conceptual approach embodied in Gelhar and Axness (1983) – and by many researchers since then (as well as previously) – was founded on delineation of the *spatial distribution* of the hydraulic conductivity and application of an averaging method to determine the governing transport equation with “effective parameters” to describe chemical transport at a given length scale.

In contrast, we assert here that *spatial* information, *alone*, is generally *insufficient* for quantification of chemical transport phenomena. Rather, *temporal* information is an additional, but *fundamental*, component in an effective modeling formulation. In the discussion below, we shall justify this argument by a series of examples. We examine (i) *spatial* information on, e.g., the hydraulic conductivity distribution at the continuum level, or distribution of the solid phase at the pore-scale level; and (ii) *temporal* information on, e.g., contaminant (tracer, “particle”) transport mobility and retention in different regions of a domain. We thus define a type of “information hierarchy”, with different types of information required for different flow and chemical transport problems of interest.

As an outcome of the above assertion and the discussion below, we further assert that “upscaling” of chemical transport equations – development and application of chemical transport

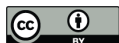

inform - are you saying unambiguous?

equations at large (length) scales, with corresponding parameter values, based on measurements and model parameter values obtained at significantly smaller length scales – is very much a holy grail. Rather, we maintain that it is necessary to formulate, calibrate and apply models using measurements at similar scales of interest, in both space and time. This does not exclude use of similar equation *formulations* at different spatial scales, but it does entail use of different parameter values, at the relevant scale of interest, that cannot be determined a priori or from purely spatial or flow-only measurements.

120  
 121

### 1.3 Approach – Outline

123

While our focus is on chemical transport, knowledge of fluid flow and delineation of the velocity field throughout the domain is a prerequisite. We therefore first discuss fluid flow as an intrinsic element aspect of the “information hierarchy”. Specifically, we address how:

- (1) Basic structural information on “conducting elements” in a system representing a geological domain (porous and/or fractured) can provide basic insight regarding overall fluid conduction in the domain, as a function of “conducting element” density. We emphasize that without direct simulation of fluid flow (as well as chemical transport) in such a system, this type of analysis is insufficient in terms of defining the actual flow field and velocity distributions throughout the domain.
- (2) Spatial information on, ~~in particular~~, the hydraulic conductivity distribution at a continuum scale, or solid phase distribution at the pore scale, throughout the domain, can be used to *determine the flow field*. We then show that this is insufficient ~~in terms of~~ <sup>to</sup> defining chemical transport.
- (3) Temporal information on chemical species migration, which quantifies distributions of retention and release times (or rates) of chemicals by advective-dispersive-diffusive and/or chemical mechanisms, can be used to *determine the full spatial and temporal evolution of a migrating chemical plume*, either by solution of a transport equation or use of particle tracking on the velocity field.

~~We comment, parenthetically, that in conceptual philosophical terms, this hierarchy and the “limitations” of each level are in a sense analogous to representation of geometrical constructs in multiple dimensions. In principle, one can represent, as a *projection*, a d-dimensional object in d–1 dimensions. But of course, by its very nature, a *projection* does not capture all features of the construct in its “full” dimension. To illustrate, an (imaginary) 1d curve can represent a 2d Möbius strip, a 2d perspective drawing can represent a 3d cube, and a 3d construct can represent a 4d object (where the 4<sup>th</sup> dimension might be considered time) — and yet, none of these d–1 dimensional representations contains all features of the actual d-dimensional objects. Similarly, despite our frequent attempts to the contrary, one cannot properly describe (2) only from (1), or (3) only from (2).~~

Does not add, in my opinion

I find this style of writing problematic.

151  
 152

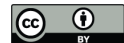

## 2 Fluid flow

Prior to actually solving for fluid flow, to determine the underlying velocity field, efforts are sometimes invested in considering geometrical (structural) information, for example, when examining fracture networks in essentially impermeable host rock.

In this context, percolation theory (Stauffer and Aharony, 1994) is particularly useful in determining, statistically, whether or not a domain with  $N$  “conducting elements” (e.g., fractures) includes sufficient element density to form a connected pathway enabling fluid flow across the domain. One can estimate, in this context, the critical value,  $N_c$ , for which the domain is “just” connected, as a function of fracture length distribution, or the critical average fracture length as a function of  $N$  needed to reach domain connectivity (Berkowitz, 1995). Similarly, percolation theory shows how the overall hydraulic conductivity of the domain scales as the number of conducting elements,  $N$ , relative to the  $N_c$  critical number of conducting elements required for the system to begin to conduct fluid. Percolation theory also addresses diffusivity scaling behavior of chemical species. But, fundamentally, percolation is a statistical framework suitable for large (“infinite”) domains, and provides universal scaling behaviors with no coefficient of equality.

Other approaches have been advanced to analyze domain connectivity, e.g., using graph theory and concepts of identification of paths of least resistance in porous medium domains (e.g., Rizzo and de Barros, 2017). Like percolation theory, such approaches provide useful information and “estimates” on the hydraulic connectivity and flow field, and even on first arrival times of chemical species, without solving equations for fluid flow and chemical transport. However, these methods do not provide full delineation of the flow field and velocity distribution throughout a domain.

It is thus clear that, in general, there are dynamic aspects of fluid flow, over and above pure structure: knowledge of pure geometry is not sufficient, and *we must actually solve for the flow field*, at either the pore-scale or a continuum scale, to determine the velocity field and actual flow paths throughout the domain. Delineation of a flow field and velocity distribution by solution of the Navier-Stokes equations (or Stokes equation for small Reynolds numbers), or by solution of the Darcy equation, may be considered “rigorous”, correct and effective. But in the process of solving for the flow field, two *key* features arise, one more relevant to pore-scale analyses, and the other more relevant to continuum-scale analysis, as detailed in Sect. 2.1 and Sect. 2.2, respectively.

### 2.1 Pore-scale flow field analysis

Why is knowledge only of the geometrical “static” structure (spatial distribution of solid phase) insufficient to know the flow dynamics in a pore-scale domain? Consider the 2d domain shown in Figure 1, containing sparsely and randomly distributed obstacles (porosity of 0.9). Figure 1 shows solutions of the Navier-Stokes equations for two Reynolds number ( $Re$ ) values. [Recall:  $Re \equiv \rho v L / \mu$ , where  $\rho$  and  $\mu$  are density and dynamic viscosity of the fluid, respectively,  $v$  is fluid velocity, and  $L$  is a characteristic linear dimension.]. Andrade et al. (1999) showed clearly that



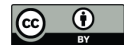

well-defined preferential flow channels at lower  $Re$ , while at higher  $Re$ , channeling is less intense and the streamline distribution is more spatially homogeneous in the direction orthogonal to the main flow.

Figure 1 demonstrates that the streamlines in individual pores change because of the interplay between inertial and viscous forces, given by  $Re$ . In other words, with a change in overall fluid velocity (or hydraulic gradient) across the domain, the actual flow paths can be altered, together with a change in overall and (spatially) local residence times of fluid molecules (and chemical species, as addressed below). Of course, the significantly lower porosities and more tortuous pore space configuration in natural, heterogeneous geological porous media may affect the impact of inertial effects, but the principle remains relevant. [We note, too, parenthetically, that the behavior shown in Fig. 1 is relevant also to fluid flow within fracture planes, wherein the obstacles represent contact areas and regions of variable aperture.]

Clearly, then, except in highly idealized and simplified geometries, use of a purely analytical solution to identify the full velocity field and streamline patterns is not feasible. Moreover, the extent and changes in streamlines are not intuitively obvious without full numerical solution of the governing flow equations, for any specific set of porous medium structures and boundary conditions.

*REALLY UNCONVINCING! IN ALMOST ALL G.W. SYSTEMS FLOW IS NON-INERTIAL ( $Re < 1$ ). THIS ARGUMENT DOES NOT CORRELATE WITH NATURE, AND WILL MISLEAD READERS WHO ARE NOT AWARE OF THESE FACTS.*

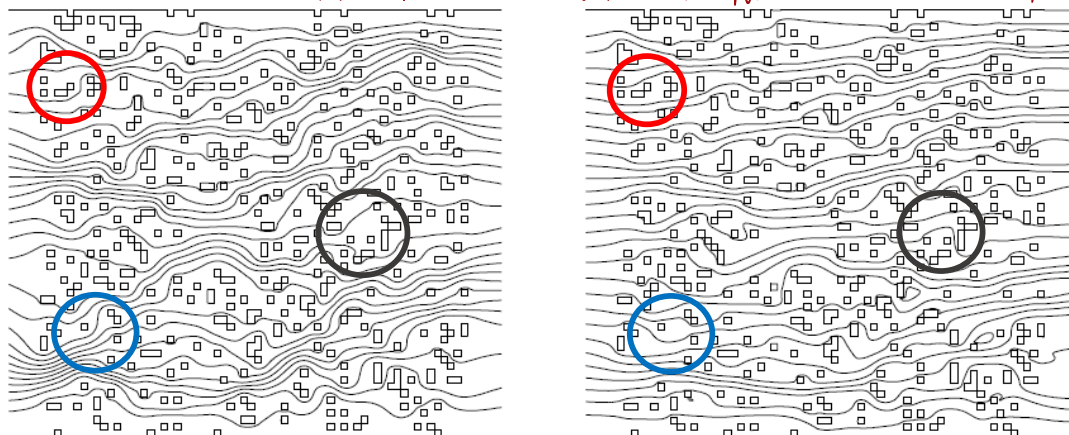

(a)  $Re = 0.0156$

(b)  $Re = 15.6$

**Figure 1.** 2d domain containing randomly distributed obstacles (squares and rectangles). Stream functions for (a)  $Re = 0.0156$  and (b)  $Re = 15.6$  are shown with constant increments between consecutive streamlines (modified from Andrade et al., 1999, <https://doi.org/10.1103/PhysRevLett.82.5249>; Copyright, American Physical Society). The different patterns of preferential pathways are clear and distinct. The three pairs of circles (red, blue, black) highlight three (of many) specific locations where the streamlines are seen to change as a function of  $Re$ .



## 2.2 Continuum-scale flow field analysis

238

239 Considering now continuum-scale domains, but in analogy to the example shown in Sect. 2.1, we  
 240 illustrate why knowledge only of the geometrical “static” structure (spatial distribution of the  
 241 hydraulic conductivity) is insufficient to know the flow dynamics, without solution of the Darcy  
 242 equation.

243 Figure 2 represents a realization of a numerically-generated (statistically homogeneous,  
 244 isotropic, Gaussian) hydraulic conductivity ( $K$ ) 2d domain. The Darcy equation solution for this  
 245 domain yields values of hydraulic head throughout the domain; these are converted to local  
 246 velocities, to enable delineation of the streamlines and preferential flow paths. The latter are  
 247 highlighted by actually solving for chemical transport, by following the migration of “particles”  
 248 representative of masses of dissolved chemical species injected along the inlet boundary of the  
 249 flow domain; see Edery et al. (2014) for details. Of particular significance is that 99.9% of the  
 250 injected particles travel in preferential pathways through a limited number of domain cells. We  
 251 return to Figure 2 in Sect. 3.3.2, where we discuss a framework that effectively characterizes and  
 252 quantifies chemical transport.

253 Unlike the pore-scale case shown in Sect. 2.1, at the Darcy/continuum scale, streamlines are  
 254 not altered with changes in the overall hydraulic gradient, as long as laminar flow conditions are  
 255 maintained. And yet, preferential flow paths are (surprisingly) sparse and ramified, sampling only  
 256 limited regions of a given heterogeneous domain, with the vast fraction of a migrating chemical  
 257 species that interrogates the domain being even more limited. Significantly, except in highly  
 258 idealized and simplified geometries (e.g., homogeneous media), delineation of these pathways is  
 259 not intuitively obvious (e.g., by simple inspection of the hydraulic conductivity map in Fig. 2a) or  
 260 definable from a priori analysis or tractable analytical solution. Rather, numerical solution of the  
 261 governing flow equations is required, for any particular/specific set of porous medium structures  
 262 and boundary conditions. [Note, too, that critical path analysis from percolation theory (discussed  
 263 in Sect. 2) – again from purely “static” information without solution of the flow field – yields an  
 264 incorrect interpretation, as shown in detail by Edery et al. (2014).]

265 We emphasize that the delineation of “preferential flow paths” is usually relevant only for  
 266 study of chemical transport; if water *quantity*, alone, is the focus, then specific “flow paths”  
 267 travelled by water molecules – and their advective and diffusive migration along and between  
 268 streamlines, and into/out of less mobile regions – are of little practical interest. The movement of  
 269 chemical species, on the other hand, which experience similar advective and diffusive, and thus  
 270 “dispersive”, transfers, must be monitored closely to be able to quantify overall migration through  
 271 a domain. We return to consider patterns of chemical migration in Sect. 3. But this argument, too,  
 272 reinforces the assertion that delineation of actual chemical transport cannot be deduced purely  
 273 from spatial information and solution for fluid flow, but must be treated by solution of a transport  
 274 equation.

275

276

277

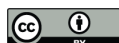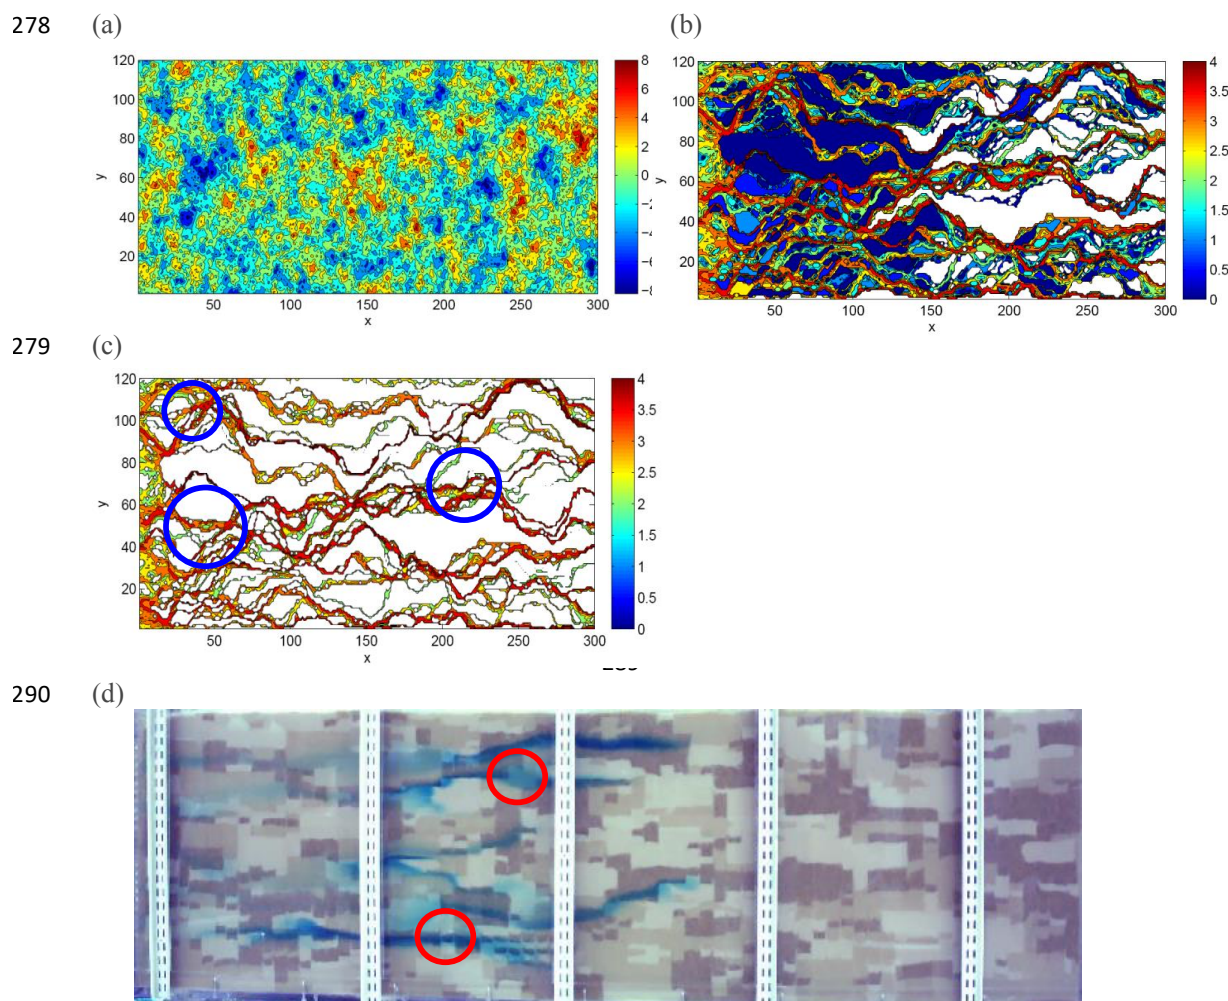

**Figure 2.** Maps of (a) hydraulic conductivity,  $K$ , distribution in a domain with  $300 \times 120$  cells, (b) preferential pathways for fluid flow (and chemical transport), and (c) preferential pathways through cells that each contain a visitation of at least 0.1% of the total number of chemical species particles injected into the domain (flux-weighted, along the entire inlet boundary). Flow is from left to right. Note that the color bars are in  $\ln(K)$  scale for Figure 2a, and  $\log_{10}$  number of particles for Figures 2b,c (modified from Edery et al., 2014; © with permission from the American Geophysical Union 2014). (d) Laboratory flow cell, 2.13 m length, with an exponentially correlated  $K$  structure, showing preferential pathways for blue dye injected near the inlet (flow is left to right); dark, medium, and light colored sands represent high, medium and low conductivity, respectively (modified from Levy and Berkowitz, 2003; © with permission from Elsevier 2003). The circles shown in (c) and (d) highlight two (of many) regions in which the pathways are seen to contain lower  $K$  “bottlenecks”.

It is significant, too, that fluid flow (and chemical transport) occurs in preferential pathways that contain low conductivity sections (indicated by circles in Figs. 2c,d). How do we explain passage through “bottlenecks” (low hydraulic conductivity patches) within the preferential





317 pathways, and that fluid (and chemicals) do not migrate “only” through the highest conductivity  
 318 patches?

319 To address this question, we begin by considering what happens in a 1d path. Consider two  
 320 paths, each containing a series of five porous medium elements (or blocks), with distinct hydraulic  
 321 conductivity ( $K_i$ ) values. Consider Path 1, with a series hydraulic conductivity values of 3, 3, 3, 3,  
 322 3, and Path 2, with values 6, 6, 1, 6, 6 (specific length/time units are irrelevant here). The value of  
 323  $K = 1$  represents a clear “bottleneck” in an otherwise higher  $K$  path than that of Path 1. In a 1d  
 324 series, however, the overall hydraulic conductivity ( $K_{\text{overall}}$ ) of the path is given by the harmonic  
 325 mean of the conductivities of the elements comprising the path:  $K_{\text{overall}} = 5 / (\sum_{i=1,5} 1/K_i)$ ;  
 326 significantly, in the two cases here, both paths have  $K_{\text{overall}} = 3$ ! So a “bottleneck” ( $K=1$ ) can be  
 327 “overcome” and does not cause necessarily cause a potential pathway to be less “desirable” than a  
 328 pathway without such “bottlenecks”. Of course, in 2d and 3d systems, patterns of heterogeneity  
 329 and pathway “selection” by water/chemicals are significantly more “complicated”, but the  
 330 principle discussed here for 1d systems still holds, in the sense that lower hydraulic conductivity  
 331 (“bottleneck”) elements can (and do) exist in the preferential pathways (Margolin et al., 1998;  
 332 Bianchi et al., 2011).

I did not  
 see the  
 point of  
 this  
 calc.

### 335 3 Chemical transport

336  
 337 We now consider the next level of the “information hierarchy” outlined in Sect. 1.3. To quantify  
 338 the evolution of a migrating chemical plume, knowledge of the flow field is not generally  
 339 sufficient, and additional means to characterize and quantify the behavior are needed. Dynamic  
 340 aspects of chemical transport require us to think (also) in terms of *time*, not just *space* and physical  
 341 structure. Moreover, it is generally insufficient to determine the transport of the chemical plume  
 342 center of mass. Rather, in terms of water resource contamination and remediation, for example, it  
 343 is critical to characterize, respectively, the early and late arrival times at compliance (monitoring)  
 344 regions downstream of the region (point, areal, volumetric) in which the chemical species entered  
 345 the system.

346 As we show below, it becomes clear that, in general, there are dynamic aspects of chemical  
 347 transport, on over and above the role of the flow field, and *we must actually solve for chemical*  
 348 *transport*, at either the pore-scale or a continuum scale, to determine the spatiotemporal (spatial  
 349 plume and/or temporal breakthrough curve) evolution of the migrating chemical plume. In *both*  
 350 pore-scale and continuum-scale domains, the *critical* control that arises is that of time (in addition  
 351 to space). This is in sharp contrast to fluid flow at pore and continuum scales, as shown in Sect.  
 352 2.1 and Sect. 2.2: pore-scale fluid flow displays changing streamlines with changes in hydraulic  
 353 gradient, while continuum-scale fluid flow follows distinct but difficult to identify preferential  
 354 flow paths essentially independent of the hydraulic gradient.

355 We point out, too, that for both pore-scale and continuum-level scenarios, one can solve,  
 356 explicitly, a governing equation for transport. Alternatively, though, one can obtain an  
 357 “equivalent” solution by solving for (Lagrangian framework) “particle tracking” of transport along



the calculated streamlines. In other words, particle tracking methods essentially represent an alternative means to solve an ((integro-)partial differential) equation for chemical transport; such methods can be applied, too, when the precise partial differential equation is unknown or the subject of debate. We also note that solution of the relevant equations for fluid flow and chemical transport is sometimes achieved by (semi-)analytical methods, if the flow/transport system can be treated sufficiently simply (e.g., macroscopically, section-averaged 1d flow and transport in a rectangular domain).

We first discuss principal features of pore-scale (Sect. 3.1) and continuum-scale (Sect. 3.2) chemical transport, and in Sect. 3.3, we focus on effective model formulations.

### 3.1 Pore-scale chemical transport analysis

To illustrate why knowledge only of only the flow field is insufficient for full quantification of chemical transport, consider the three porous medium domains shown in Fig. 3. Each domains is comprised of pore-scale images of a natural rock, modified by enlarging the solid phase grains, to yield three different configurations: a statistically homogeneous system domain, a weakly correlated system, and a structured, strongly correlated system (see Nissan and Berkowitz (2019) for details). Fluid flow was determined by solution of the Navier-Stokes equations (Fig. 1a). Transport of a conservative chemical species was then simulated via a (Lagrangian) streamline particle tracking method, for an ensemble of particles that advance according to a Langevin equation. Transport behavior was determined for two values of macroscopic (domain average) Péclet number ( $Pe$ ). [Recall;  $Pe \equiv vL/D$ , where  $v$  is fluid velocity,  $L$  is a characteristic linear dimension, and  $D$  is the coefficient of molecular diffusion.] Here, the macroscopic  $Pe$  is based on the mean particle velocity and mean particle displacement distance per transition (“step”).

Figure 3 shows that regardless of possible (pore-scale) streamline changes as a function of hydraulic gradient (recall Sect. 2.1, considering different values of  $Re$ ), the choice of *macroscopic* Péclet number in a given domain plays a significant role in the evolution of the migrating chemical plume. In particular, the relative effects of advection and diffusion, which vary locally in space, are critical, as is the overall residence time in the domain. We stress here (and return to this key point in discussion below) that the spatially (and in some case temporally) *local* changes in relative effects of advection and diffusion – characterized by the *local*  $Pe$  – dominates determination of the plume evolution. This can be understood from study of Fig. 3, in each of the three heterogeneity configurations, for two choices of macroscopic  $Pe$  values; the different patterns of longitudinal and transverse spreading are observed clearly.

The behavior show in Fig. 3 is essentially well-known from extensive simulations and experiments appearing in the literature. This behavior is described here to stress the importance of *temporal* effects, and to point out that information only of the advective velocity field – as discussed in Sect. 2.1 and Sect. 2.2 – is not sufficient to “predict” chemical transport.

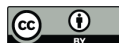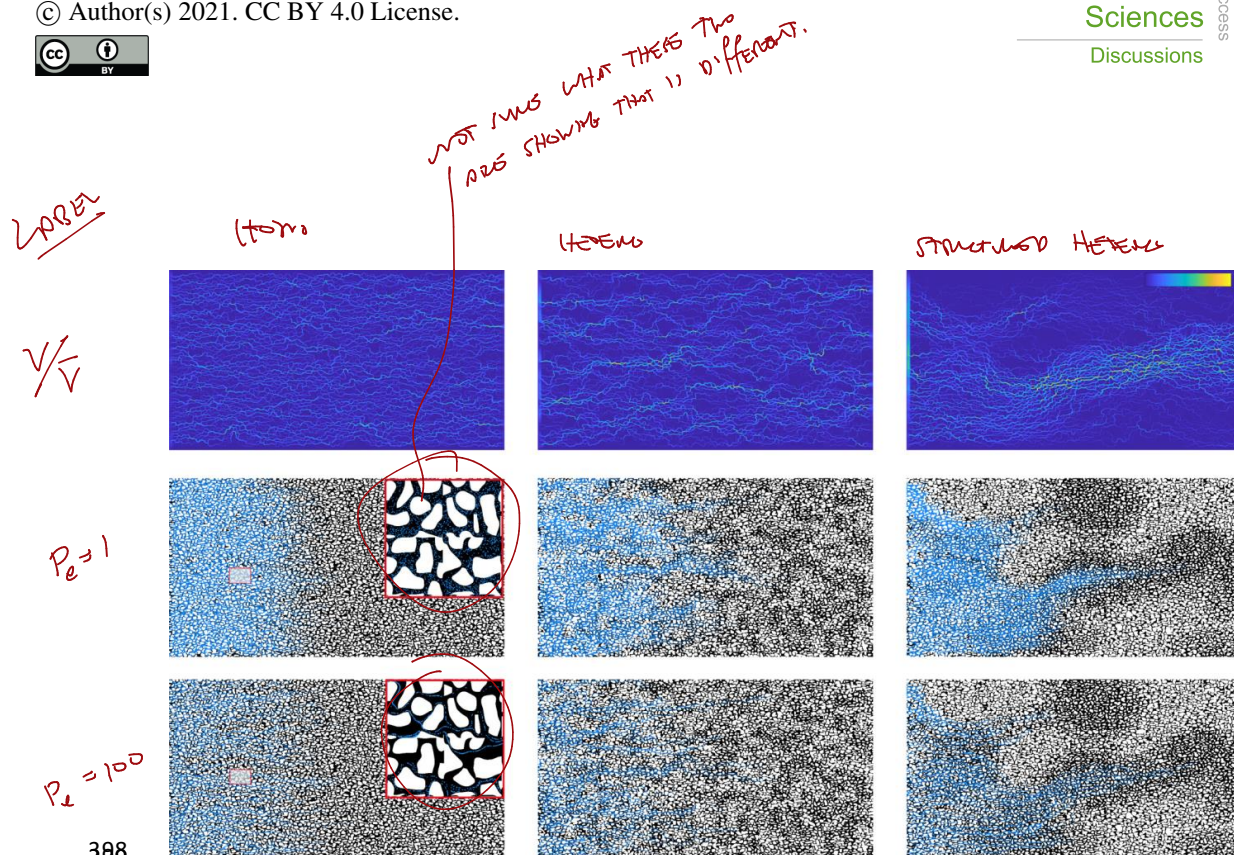

**Figure 3.** Fluid velocities and chemical migration in three porous media configurations (from left to right): homogeneous system, randomly heterogeneous system, and structured heterogeneous system. The upper row shows the (normalized) velocity field for the three configurations; the color bar represents relative velocity, with dark blue being lowest. The middle and lower rows show, respectively, numerically-simulated particle tracking patterns of an inert chemical species (blue dots) at  $Pe = 1$  (middle row) and  $Pe = 100$  (lower row) for the three configurations (white color indicates solid phase; black color indicates liquid phase). Note: The particles plumes are shown at 10% of the final time of each simulation; absolute travel times differ among the plots. The insets in the left side plots of the middle and lower rows show the pore-scale chemical species distributions; note the more diffuse pattern for  $Pe = 1$  (from Nissan and Berkowitz, 2019, <https://doi.org/10.1103/PhysRevE.99.033108>; © with permission from American Physical Society 2019).

### 3.2 Continuum-scale chemical transport analysis

The aspects discussed in Sect. 3.1 are relevant, analogous and essentially applicable also to chemical transport at the continuum scale. Consider the two laboratory experiments shown in Fig. 4 and Fig. 5. Each flow cell was filled with a different clean, sieved sand configuration; see Levy and Berkowitz (2003) for details. Figure 4 shows a uniform (“homogeneous”) packing of clean sand, while Fig. 5 shows a “coarse” sand containing a randomly heterogeneous arrangement of rectangular inclusions consisting of a “fine” sand. The flow cells, fully saturated with water, enabled macroscopically (section-averaged) 1d, steady-state flow, with a mean gradient parallel to the horizontal axis of the cell. As seen in the two figures, neutrally-buoyant, inert red dye was injected at seven (Fig. 4) and five (Fig. 5) points near the inlet side, to illustrate the spatiotemporal evolution of the chemical plumes.

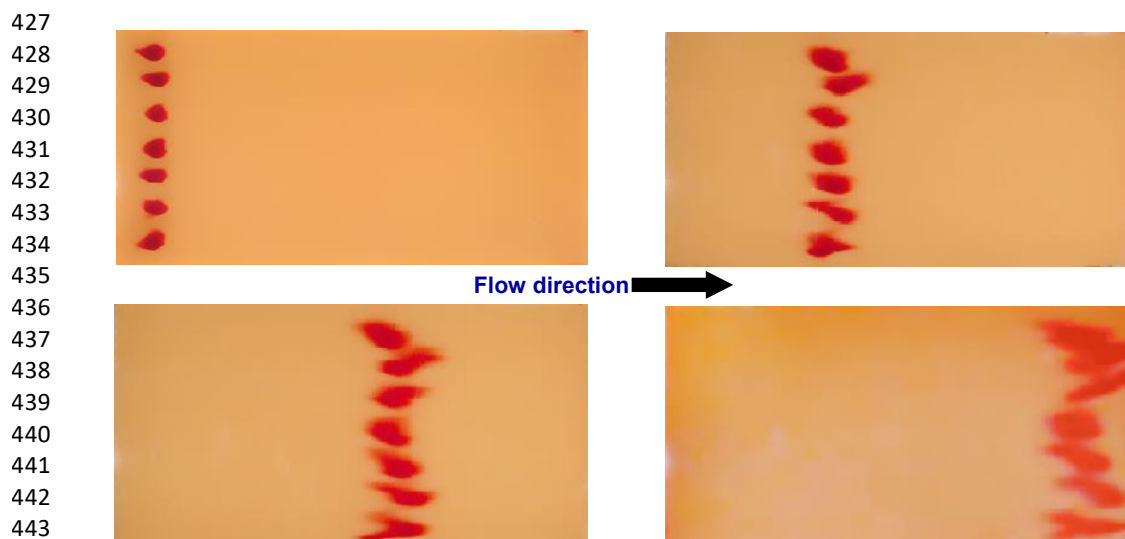

**Figure 4.** Photographs of dye transport in a flow cell (internal dimensions  $0.86 \times 0.45 \times 0.10$  m) containing a uniform packing of quartz sand (average grain diameter 0.532 mm), under a constant flow rate, at four times (modified from Levy and Berkowitz, 2003; © with permission from Elsevier 2003).

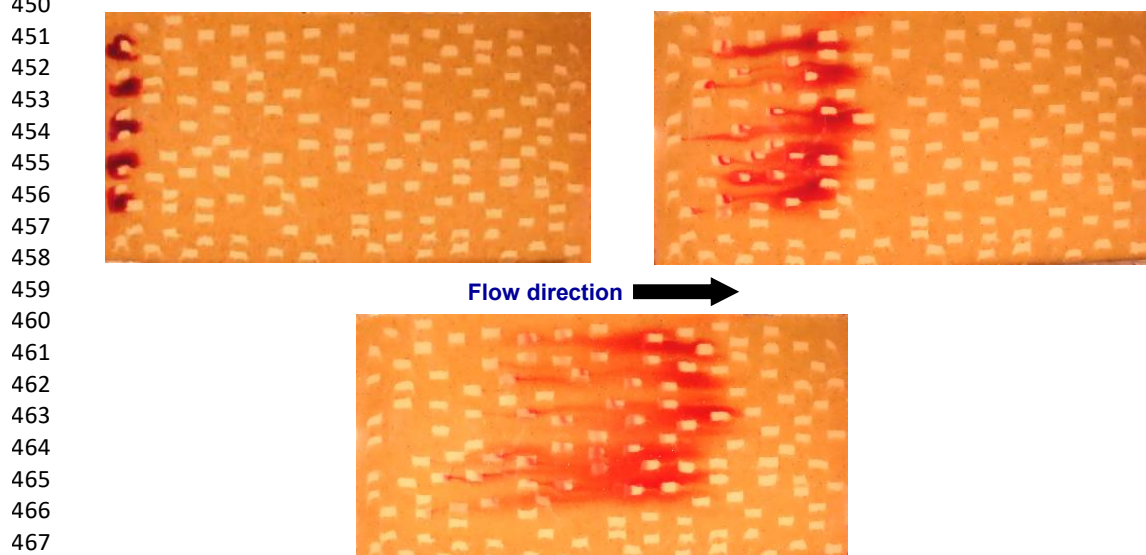

**Figure 5.** Photographs of dye transport in a flow cell (internal dimensions  $0.86 \times 0.45 \times 0.10$  m) containing a randomly heterogeneous packing of quartz sand, under a constant flow rate, at three times. The rectangular inclusions comprise sand with an average grain diameter  $\sim 0.5\times$  smaller, and hydraulic conductivity  $\sim 3\times$  lower, than the surrounding sand matrix (modified from Levy and Berkowitz, 2003; © with permission from Elsevier 2003).





Time scales? 20-100?  
 What if we

Most notably, in both Fig. 4 and Fig. 5: (i) each of the plumes has a different, unique pattern, which continues over the duration of the plume migration; and (ii) none of the plumes is “elliptical”, as expected in classical Fickian transport theory and embodied in solutions of the classical advection-dispersion equation (ADE). Indeed, vertical averaging of each plume shown in Fig. 4 and Fig. 5, at each time, does not yield Gaussian (normally distributed) concentration profiles, but rather asymmetrical, “heavy-tailed” profiles.

At this juncture, we note that here and below that we use the terms “non-Fickian”, or “anomalous” – others sometimes use the terms “pre-asymptotic” or “pre-ergodic” – to denote any chemical transport behavior that differs from that described by the classical ADE or similar type of continuum-scale formulation. Typically, though, non-Fickian transport is characterized by early and or late arrival times of migrating chemical species to some control or measurement plane/point, relative to those resulting from solution of the ADE. The ADE applies to so-called Fickian behavior, in the sense that it accounts for mechanical dispersion as a macroscopic form of Fick’s law; mechanical dispersion arises as an “effective” (or “average”) quantity that describe local fluctuations around the average (advective) fluid velocity. Thus, in this formulation, a pulse of chemical introduced into a macroscopically 1d, uniform velocity, for example, leads to temporal and spatial concentration distributions that are equivalent to a normal (Gaussian) distribution.

It is in this context that the term “homogeneous” packing used above is placed in quotation marks, to indicate that in natural geological media, “homogeneity” does not really exist. Any natural geological sample of porous medium contains multiple scales of heterogeneity; and at each particular scale of measurement, “unresolved” heterogeneities that are essentially unmeasurable are present (even scanning electron microscopy and atomic force microscopy have limits of spatial resolution, for example!). And thus, as seen in Fig. 4 for example, the overall transport pattern even in an “homogeneous” system can be non-Fickian (anomalous). *We therefore emphasize that because natural heterogeneity in geological formations occurs over a broad range of scales, “normal” (Fickian) transport tends to be the “anomaly”, whereas “anomalous” (non-Fickian) transport is ubiquitous, and should be considered “normal”.*

Moreover, as noted in Sect. 2.2, streamlines are not altered with changes in the overall hydraulic gradient, at the continuum (Darcy) scale, as long as laminar flow conditions are maintained, because increasing the hydraulic gradient increases the fluid velocity along the existing (“predefined”) streamlines by the same factor. However, the character of chemical transport can be altered, as the change in residence time in the domain affects the relative effects of advection and diffusion space. And in domains with heterogeneous distributions of hydraulic conductivity, the local Pe (Sect. 3.1) can vary more strongly, too.

Thus, we argue that patterns of chemical transport cannot be fully determined from information only on the velocity field; solution of an appropriate continuum-scale transport equation cannot be avoided. In conclusion, then, and with particular reference to the (conceptually and theoretically beautiful) classical ADE and “conventional” conceptual understanding and quantitative description of chemical transport, we suggest that one must separate mathematical convenience and wishful thinking from the reality of experiments: there is a definitive need for more powerful





formulations of transport equations. In this context, one is reminded of the quotation by the biologist Thomas Henry Huxley: “The great tragedy of science—the slaying of a beautiful theory by an ugly fact.” (*President's Address to the British Association for the Advancement of Science, Liverpool Meeting, 14 Sep 1870*).

### 3.3 Modeling chemical transport, and the myth that “fewer parameters is always better”

So how *do* we effectively model chemical transport?

As noted at the outset of Sect. 2, solution of the Navier-Stokes or Darcy equations to determine the full *flow* field and velocity distribution in a given porous medium domain has been proven correct and effective in most applications, and is well-accepted in the literature. However, modeling of chemical transport is more contentious, the reasons for which we expand upon below.

We argue here that modeling of chemical species transport requires us to think in terms of *time*, not just *space*. To assist the reader to enter this frame of thinking, and to sharpen our conceptualization, we provide two examples to illustrate aspects of time and space in the context of chemical transport dynamics:

- (1) The classical example of the brachistochrone (ancient Greek: “shortest time”), or path of fastest descent, is the curve (path) that would carry an idealized point-like body, starting at rest and moving along the curve, without friction, under constant gravity, to a given end point in the shortest time. (Correct solution: Johann Bernoulli, 1697) Somewhat non-intuitively, the path that leads to the shortest travel time is not a straight line, but, rather, a special curve that is longer than a straight line (a cycloid)! (See: <http://old.nationalcurvebank.org/brach/brach.htm>)
- (2) What error can be introduced when “averaging” in terms of “space”? Consider the case of driving a total distance of 100 km, by first traveling 50 km at 1 km h<sup>-1</sup>, and then traveling 50 km at 99 km h<sup>-1</sup>. If we average the speed in terms of space (distance), then we traveled two segments of 50 km at two speeds, so the average speed is  $(1 + 99) / 2 = 50$  km h<sup>-1</sup>. In this framework, the total time to travel the 100 km “should” only have been 2 h. However, in terms of *time*, the travel time is actually 50.5 h.

These simple examples help to emphasize the errors introduced by traditional conceptual thinking, wherein the effects of *spatial* transport and domain heterogeneity are quantified only on the basis of spatial characteristics. It is worth recalling, too, Einstein’s quantitative treatment of Brownian motion (Einstein, 1905). Prior to his analysis, researchers applied – with puzzlement – a time-dependent velocity,  $v$ , to quantify experimental measurements. Einstein (1905) instead examined a recursion relation and expansion that led to a diffusion equation whose solution showed, for the first time, that the root mean squared displacement of particles undergoing Brownian motion is proportional to  $\sqrt{t}$ , and not to  $vt$  as had been assumed traditionally. An astounding conceptual breakthrough over a century ago, this nature of diffusive motion is now “common knowledge”.



555 In this same framework of focusing on *time*, the examples shown in Fig. 4 and Fig. 5 emphasize  
 556 that for chemical transport, we must recognize the critical role of “*rare events*”. These rare events  
 557 involve chemical species (migrating “particles” or “packets”) that are held up or retained in (while  
 558 traveling through, or in/out of) lower velocity regions (pore scale or continuum scale) in the porous  
 559 domain, over various periods of time. Such events can have a dominant impact on overall transport  
 560 patterns. In this context, one must exercise caution with simple averaging of “small velocity  
 561 fluctuations” and effects of molecular diffusion. Rather, small-scale heterogeneities (in both space  
 562 and time) do not necessarily “average out” or become insignificant at larger scales; rather, the  
 563 effects of “rare events” (e.g., temporary trapping of even small amounts of chemical species via  
 564 diffusion into and out of low velocity regions) and fluctuations can propagate and become  
 565 magnified, *within and across* length scales from pore to aquifer.

566 Armed with these thoughts, we suggest that modeling chemical transport has been contentious  
 567 for at least three reasons:

- 568 1. The desire to work with spatial averaging approaches and equations: The research  
 569 community was (and still is) split over the need to recognize and incorporate, *explicitly*,  
 570 influences of temporal mechanisms caused largely by spatial heterogeneity (as  
 571 characterized by the domain hydraulic conductivity), when formulating “effective” (or  
 572 “averaged”) equations. And even when recognized, debate remains as to appropriate  
 573 mathematical formulation.
- 574 2. The lack of data: At least part of the difficulty in developing appropriate models is the lack  
 575 of availability of high-resolution laboratory data and field measurements against which  
 576 chemical transport models can be tested. Indeed, many elaborate theoretical developments  
 577 have been advanced over the decades, with accompanying, analytical and numerical  
 578 solutions — and yet, remarkably, comparative studies against actual laboratory data remain  
 579 limited, and tests with field measurements are even sparser (see also Sect. 4 for further  
 580 discussion of this point).
- 581 3. The choice of approach to, and purpose of, chemical transport modeling: Two overarching  
 582 approaches to quantifying chemical transport can be defined, focusing on (i) quantification  
 583 of “effective”, “overall” chemical transport behavior without requiring high-resolution  
 584 discretization and numerical solution of the domain, and, alternatively, (ii) high-resolution  
 585 hydrogeological delineation and then intensive numerical simulation on highly discretized  
 586 grids. We address approaches (i) and (ii) individually, below, in the context also of points  
 587 (1) and (2).

588 The debate in the literature between “effective” and high-resolution hydrogeological modeling,  
 589 as well as various preconceptions and misconceptions discussed below and in Sect. 4, lead  
 590 naturally to consideration of the (often incorrectly invoked) argument that “fewer model  
 591 parameters is better”.

592 We first discuss briefly aspects of high-resolution hydrogeological modeling in Sect. 3.3.1,  
 593 and then focus on “effective” transport equation modeling in Sect. 3.3.2. We emphasize that the  
 594 latter approach is applicable to both small- and large-scale domains. The former approach is

Challenging?



generally intended for large- (field-)scale systems (although, in a sense, the same approach is often applied for detailed pore-scale modeling); this approach is ~~not particularly contentious, per se, but~~ is hampered by the complexity and cost associated with the demand for highly detailed hydrogeological information. Therefore, research work remains heavily invested in “effective” transport equation modeling.

600

601

### 602 3.3.1 High-resolution domain delineation and modeling

603

Efforts to resolve large-scale aquifer systems, to delineate the hydraulic conductivity distribution at increasingly higher resolutions, began in earnest in the 1990s. Analysis of field sites emphasized (relatively) high-resolution discretization of domain structure (e.g., “blocks” of the order of  $10 \text{ m}^3$  at the field scale (Eggleston and Rojstaczer, 1998);  $200 \times 200 \times 1 \text{ m}^3$  at large regional scales (Maples et al. 2019). These efforts, first focusing on determining the fluid flow field, and subsequently on delineating pathways for chemical transport, began largely because of dissatisfaction with results of application of 1d, 2d, 3d forms of an “effective” (averaged) ADE (see further discussion in Sect. 3.3.2). Acquiring high-resolution measurements of structural (e.g., mineralogy, porosity) and hydrological properties (e.g., hydraulic conductivity) was made more feasible in recent years by advances in hydrogeophysics, and as well as by advances in computational capabilities that enable incorporation of this information in finely-discretized meshes, and numerical solution for fluid flow and chemical transport.

In these highly resolved (high-resolution) gridded domains, the flow field can be determined from solution of Darcy’s law. Chemical transport is then simulated either by use of streamline particle tracking methods (accounting for advection and diffusion in a Lagrangian framework) or via solution of a local (mesh element) continuum-scale transport equation. For chemical transport, use of an advection-*diffusion* equation might appear preferable – given that it requires no estimate for the local dispersivity, but some researchers apply an advection-*dispersion* equation, which necessitates use of mesh-scale dispersivity values that are either assumed or estimated from local measurements. The latter case assumes mesh-scale transport to be fully Fickian (recall Sect. 3.2) to quantify overall transport. More recently, we note that alternative formulations of a governing transport equation that incorporate temporal effects more broadly can also be used in this type of modeling approach; see, e.g., Hansen and Berkowitz (2020) for incorporation of a continuous time random walk method (discussed in Sect. 3.3.2) into this modeling framework.

[Parenthetically, we note that “analogous”, high-resolution measurements are made at the pore-scale – in ~~mm~~ <sup>mm</sup> to decimeter rock core samples – as a basis for computationally-intensive modeling of fluid flow and chemical transport at these scales. Similar to the evolution of this approach for field-scale studies, high-resolution measurements advanced from use of 2d rock micrographs to advanced micro-computed tomography protocols (e.g., Thovert and Adler, 2011; Bijeljic et al., 2013; recall Sect. 2.1).]

This approach is attractive in terms of the ability to “reproduce” detailed heterogeneous



hydraulic conductivity structures, and can provide useful “overall assessments” of fluid flow and chemical transport pathways, and migration of a chemical plume. Moreover, solutions for fluid flow and chemical transport can be considered “exact”, at least at the scale at which the domain is discretized (and they can thus also capture at least some aspects of non-Fickian transport). But even at this type of spatial resolution, the ability to effectively quantify actual chemical transport, even relative to the limited available field measurements, remains a question of debate, and the research community, as well as practicing engineers, still often prefer to analyze chemical transport in a domain by use of relatively simple (often 1d, section-averaged) model formulations.

Finally, we point out here that in the context of efforts to obtain increasing amounts of structural and hydrological information at a given field site, due consideration should also be given to the “worth” of data. Thus – for example – in an effort to quantify fluid flow or chemical transport in an aquifer, do we really need “full”, detailed knowledge of the system (e.g., porosity, hydraulic conductivity) at every point in the formation? Possibly non-intuitively, the adage “more data is better” is often not true, and model incorporation of statistical uncertainty can offer equally satisfactory solutions with less costly, less measurement- and computationally-intensive, detail (e.g., Dai et al., 2016).

### 3.3.2 “Effective” characterization and modeling

At least since the 1960’s, the research community has focused enormous efforts on formulation of “averaged”, or “effective” (often macroscopically, section-averaged 1d) transport equations to quantify chemical transport, without requiring high-resolution discretization and (computationally-intensive) numerical solution of the domain. The (now “classical”) ADE was advanced as the governing (partial differential) equation; see also further discussion on “effective scales of interest”, in the context of “upscaling” (Sect. 4). Recall that as discussed in Sect. 3.2, the ADE assumes Fickian transport behavior, in the sense that mechanical dispersion – which is defined as an average quantity to describe local fluctuations around the average (advective) fluid velocity – is treated macroscopically by Fick’s law. The classical ADE then specifies coefficients of longitudinal and transverse dispersivity, which by definition are constants.

Solutions of the ADE were compared against conservative tracer experiments in laboratory columns (generally 10-100 cm) to produce breakthrough curves (concentration vs. time, at a set outlet distance), but even from the outset, the applicability of the ADE was questioned by some researchers (e.g., Aronofsky and Heller, 1957; Scheidegger, 1959). Subsequent flow cell experiments demonstrated, for example, that the dispersivity constants are not actually constant, and change with length scale – even over a tens of centimeters – to achieve even *approximate* fits to the measurements (e.g., Silliman and Simpson, 1987). Moreover, solutions of the ADE appear inadequate when compared to transport in laboratory flow cells with distinct regions of different hydraulic conductivities (e.g., Maina et al., 2018). In a sense, then, it can be considered somewhat surprising that this form of the ADE was subsequently assumed to apply, over several decades, in



a rather sweeping fashion for a wide range of hydrogeological scenarios and length scales. Detailed discussions of these aspects appear in, e.g., Berkowitz et al. (2006, 2016). [Parenthetically, we stress again here that if one has complete information at the pore-scale, then solution of the Navier-Stokes and advection-diffusion equations within the pore space can capture the true chemical transport behavior, i.e., purely spatial information is sufficient to describe chemical transport. But at continuum scales, time and unresolved heterogeneities became critical, and an “averaged” equation like the ADE with a “macrodispersion” concept is problematic.]

Moving beyond the ADE, and the definitive need for effective transport equations that quantify non-Fickian (as well as Fickian) transport (recall Figs. 4 and 5), an alternative approach is to account for the temporal distribution that affects migration of chemical species, in addition to a spatial distribution, at a broad continuum level, and employ a transport equation in the spirit of a “general purpose” ADE. This approach necessarily leads to transport behaviors that are more general than those indicated by a “general ADE” (i.e., in the context of an overall, averaged 1d transport scenario for example).

To explain this approach, we refer to the continuous time random walk (CTRW) framework, which is particularly broad and general. Significantly, and conveniently, it should be recognized that special (or limit) cases of a general CTRW formulation lead to well-known related “subset” formulations that also quantify various types of non-Fickian transport. These subsets include mobile-immobile, multirate mass transfer, and time-fractional derivative formulations, as explained in, e.g., Dentz and Berkowitz (2003) and Berkowitz et al. (2006). Indeed, in spite of frequent references to these model formulations as being “different” they are closely related, with clear mathematical correspondence. Each formulation has advantages, depending on the domain, problem and objectives of model use; but model selection must first be justified physically, and it is inappropriate, for example, to apply a mobile-immobile (two domain) model to interpret chemical transport in a “uniform, homogeneous” porous medium when it displays non-Fickian transport behavior (recall Fig. 4).

Here, we describe only briefly, the principle and basic aspects of the CTRW formulation; detailed explanations and developments are available elsewhere (e.g., Berkowitz et al., 2006).

To introduce “temporal thinking” in the context of non-Fickian transport, we begin by mentioning the analogy between a classical random walk (RW) – which leads to Fick’s law – and the CTRW. A classical random walk is given in Eq. 1:

$$P_{n+1}(\ell) = \sum_{\ell'} p(\ell, \ell') P_n(\ell') \quad (1)$$

where  $p(\ell, \ell')$  represents the probability of a random walker (“particle”) advancing from location  $\ell'$  to  $\ell$ ,  $P_n(\ell')$  denotes the probability of a particle being located at  $\ell'$  at (fixed) time step  $n$ , and  $P_{n+1}(\ell)$  denotes the probability of the particle then being located at  $\ell$  at step  $n+1$ . With this formulation in mind, Einstein (1905) and Smoluchowski (1906a,b) demonstrated that for  $n$  sufficiently large and a sufficient number of particles undergoing purely (statistically) random movements in space, the spatial evolution of the particle distribution is equivalent to the solution

POWER OUT  
 WAITING.

It was to  
 update  
 include a time  
 listing the  
 framework +  
 their physical  
 bases.





of the (Fickian) diffusion equation. This elegant discovery demonstrated that a partial differential equation and its solution can be represented by following, numerically, the statistical movement of particles (i.e., particle tracking) following a random walk. Generalizing the partial differential equation to include transport by advection, solution of the ADE under various boundary conditions can then be determined by an appropriate random walk method.

The simple random walk given in Eq. 1 can be generalized by accounting for time, replacing the particle transition (or iteration) counter  $n$  by a time distribution. The generalized formalism in Eq. 2, with the joint distribution  $\psi(\mathbf{s}, t)$ , called “continuous time random walk” and applied to transport, was first introduced by Scher and Lax (1973):

$$R_{n+1}(\mathbf{s}, t) = \sum_{\mathbf{s}'} \int_0^t \psi(\mathbf{s} - \mathbf{s}', t - t') R_n(\mathbf{s}', t') dt' \quad (2)$$

where  $R_{n+1}(\mathbf{s}, t)$  is the probability per time for a particle to just arrive at site  $\mathbf{s}$  at time  $t$  after  $n+1$  steps and  $\psi(\mathbf{s}, t)$  is the probability rate for a displacement from location  $\mathbf{s}'$  to time  $\mathbf{s}$  with a difference of arrival times of  $t-t'$ . It is clear that  $\psi(\mathbf{s}, t)$  is the generalization of  $p(\ell, \ell')$  in Eq. 1, and that the particle steps can each now take place at different times. Indeed, it is precisely this explicit accounting of a distribution of temporal contributions to particle transport, not just spatial contributions, that offers the ability to effectively quantify transport behaviors as expressed by, e.g., heavy-tailed, non-Fickian particle arrival times.

To where does the generalization in Eq. 2 lead us? In a mindset similar to that of Brownian motion, and Einstein’s 1905 breakthrough mentioned above at the outset of Sect. 3.3, a puzzle arose about seven decades later for researchers attempting to interpret observations of electron transit times in disordered semiconductors. The electron mobility (defined as velocity per unit electric field), which was considered an intrinsic property of the material, was found to depend on variables that changed the duration of the experiment, such as sample length or electric field. Scher and Montroll (1975), considering Eq. 2, discovered that the mean displacement  $\bar{\ell}$  of the electron packet does not advance as  $\bar{\ell} = vt$ , but rather as  $\bar{\ell} \sim t^\beta$ .

In the context of chemical transport in geological formations, the behavior  $\bar{\ell} \sim t^\beta$  can be attributed to a wide distribution of transition times in naturally disordered geological media. In the CTRW formulation, the transition time distribution is characterized by a power law of the form  $\psi(t) \sim t^{-1-\beta}$  for  $t \rightarrow \infty$  and  $0 < \beta < 2$ ; significantly, the resulting transport behavior is Fickian for  $\beta > 2$ . At large times, for this  $\psi(t)$  dependence, the mean displacement  $\bar{\ell}(t)$  and standard deviation  $\bar{\sigma}(t)$  of the migrating chemical plume  $c(\mathbf{s}, t)$  scale as  $\bar{\ell}(t) \sim t^\beta$  and  $\bar{\sigma}(t) \sim t^\beta$  for  $t \rightarrow \infty$ ,  $0 < \beta < 1$  (Schlesinger, 1974). Moreover, for  $t \rightarrow \infty$  with  $1 < \beta < 2$ , the plume scales as  $\bar{\ell}(t) \sim t$  and  $\bar{\sigma}(t) \sim t^{(3-\beta)/2}$ . These behaviors are notably different than that of Fickian transport models, for which (from the central limit theorem),  $\bar{\ell}(t) \sim t$  and  $\bar{\sigma}(t) \sim t^{1/2}$ .

With the concepts described here, and using the generally applicable decoupled form  $\psi(\mathbf{s}, t) = p(\mathbf{s})\psi(t)$ , where  $p(\mathbf{s})$  is the probability distribution of the transition lengths and  $\psi(t)$  is the probability rate for a transition time  $t$  between sites, Eq. 2 can be developed into an (integro-)partial

You improve  
 this generally  
 w/o correction  
 to any  
 properties of  
 fluid flow in  
 porous media.  
 (e.g., could  
 describe transport  
 of oil/gas/water  
 in the ocean).  
 Motivation  
 based on  
 porous  
 media / flow  
 how is  
 useful.

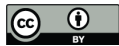

754 differential equation. Thus, the ADE given by

755

$$756 \quad \frac{\partial c(\mathbf{s}, t)}{\partial t} = -[\mathbf{v}(\mathbf{s}) \cdot \nabla c(\mathbf{s}, t) - \mathbf{D}(\mathbf{s}) : \nabla^2 c(\mathbf{s}, t)] \quad (3)$$

757

758 where  $c(\mathbf{s}, t)$  is the concentration at location  $\mathbf{s}$  and time  $t$ ,  $\mathbf{v}(\mathbf{s})$  is the velocity field and  $\mathbf{D}(\mathbf{s})$  is the  
 759 dispersion tensor, is replaced by the more general CTRW transport equation:

760

761

$$762 \quad \frac{\partial c(\mathbf{s}, t)}{\partial t} = - \int_0^t M(t - t') [\mathbf{v}_\psi \cdot \nabla c(\mathbf{s}, t') - \mathbf{D}_\psi : \nabla \nabla c(\mathbf{s}, t')] dt' \quad (4)$$

763

764 where  $\mathbf{v}_\psi$  and  $\mathbf{D}_\psi$  are generalized particle velocity and dispersion, respectively, and  $M(t)$  is a  
 765 temporal memory function based on  $\psi(t)$ .

766

767 The strength of this type of formulation is that it effectively quantifies (non-Fickian) early  
 768 arrivals and late time tailing of migrating chemical species, and the spatial evolution of chemical  
 769 plumes in heterogeneous media. For example, recalling the scenario in Fig. 2, wherein 99.9% of  
 770 the inflowing particles traverse the preferential pathways seen in Fig. 2c, detailed numerical  
 771 simulations indicate that concentration breakthrough curves exhibit significant, non-Fickian, long-  
 772 time tails (Edery et al., 2014). Choice of an appropriate power-law form of  $\psi(t)$  was then shown  
 773 to capture this behavior; moreover, a functional form defining the value of the power-law exponent  
 774  $\beta$  in  $\psi(t)$  was identified, based on statistics of the hydraulic conductivity and particle interrogation  
 of the domain (Edery et al., 2014).

775

776 Equation (4) is essentially an ADE weighted by a temporal memory. When  $\psi(t)$  is an  
 777 exponential function (or power law but for  $\beta \geq 2$ ),  $M(t) \rightarrow \delta(t)$  and we recover Fickian transport  
 778 described by the ADE; thus, the ADE assumes, implicitly, that particle transition times are  
 779 distributed exponentially. But with a power law form  $\psi(t) \sim t^{-1-\beta}$  for  $0 < \beta < 2$ , the transport is  
 780 non-Fickian. A wide range of functional forms of  $\psi(t)$  can be chosen, including, e.g., truncated  
 781 power law forms that allow evolution to Fickian transport at large times or travel distances (e.g.,  
 782 Berkowitz et al., 2006), as well as Pareto (e.g., Hansen and Berkowitz, 2014) and curved (or  
 783 inverse gamma; e.g., Nissan and Berkowitz, 2019) temporal distributions. Other, generally  
 784 simpler, choices of  $\psi(t)$  or  $M(t)$  lead to mobile-immobile, multirate mass transfer, and time-  
 785 fractional derivative formulations. We note, too, that the elegant result derived by Gelhar and  
 786 Axness (1983) and others, discussed in Sect. 1.2, is valid only at an asymptotic limit, wherein  
 transport is Fickian and there is no residual non-Fickian memory in the plume advance.

787

788 Each of these power law forms of course requires one or more parameters – at least  $\beta$  – and in  
 789 some cases, other parameters that define, e.g., a transition time from non-Fickian to Fickian  
 790 transport (Berkowitz et al., 2006; Hansen and Berkowitz, 2014; Nissan and Berkowitz, 2017).  
 791 These parameters have physical meaning, and are not purely empirical; perspectives on “numbers  
 792 of parameters” associated with all models are discussed in Sect. 3.3.3. The question of how model  
 parameter values are determined is addressed in Sect. 4.1.

793

The efficacy of formulations that incorporate, whether explicitly or implicitly, some type of



power-law characterization of temporal aspects of chemical transport, is now generally recognized in the literature. Indeed, applications of mobile-immobile, multirate mass transfer, time-fractional advection-dispersion, and general CTRW formulations have been applied quite extensively and successfully. In particular, solutions of Eq. 4 and related variants have interpreted a wide range of chemical transport scenarios: (i) pore-scale to meter scale laboratory experiments, field studies, and numerical simulations, in (ii) porous, fractured, and fractured porous domains, (iii) accounting for constant and time-dependent velocity fields, and (iv) for both conservative and reactive chemical transport scenarios. Solutions to address some of these scenarios are more easily obtained by use of particle tracking methods that incorporate the same considerations and power-law form of  $\psi(t)$ , as embedded in Eq. 4.

It should be recognized that, like the ADE, Eq. 3, the formulation given in Eq. 4 represents a continuum-level mechanistic model. Discussion in the literature about the need for “mechanistic models” often uses the term rather loosely: “mechanistic” transport model equations are based on fundamental laws of physics, with (constant) parameters that have physical meaning (e.g., hydraulic conductivity, diffusivity, sorption), and thus offer process understanding. But to quantify the spatiotemporal evolution of a migrating chemical plume, additional parameters are needed. We argue that, because of the nature of geological materials, a transport equation should of course capture the relevant physical (and chemical, if the species is reactive) mechanisms that impact the transport, but to do so, we must *also* capture the uncertain characterization of hydrogeological properties due to the reality of unresolved (unmeasurable) heterogeneities at any length scale of interest. Thus, we suggest that a *mechanistic-stochastic equation formulation* such as given in Eq. 4 (which incorporates a probability density function to account for temporal transitions that cannot be determined only from spatial information) is required, describing known transport mechanisms (and with physically meaningful parameters), and accounting for unknown (and unknowable!) information.

We note here, too, that other stochastic continuum averaging methods have been proposed in the literature, in the same context of efforts to formulate a “general”, “effective” transport equation at a specific scale of interest (see further discussion on “effective” equations and “upscaling” in Sect. 4). In many cases, though, sophisticated stochastic averaging and homogenization approaches have led to transport formulations that are essentially intractable, in terms of solution, and/or have remained at the level of hypothesis without being tested successfully against actual data.

826

827

### 828 3.3.3 Are fewer parameters always better? (Answer: No!)

829

The term “modeling” is used in many contexts and with differing intents. However, in the literature dealing with chemical transport in subsurface hydrological systems, there are frequent (often misguided!) “arguments” regarding “which model is better”, with a major point of some authors being the claim that “fewer parameters is always best”. Not always. Indeed, some models

— Would this  
 this have  
 shown?  
 No size  
 connection is  
 provided.



involve more parameters than others, but if these parameters have physical meaning and are needed as factors to quantify key mechanisms, then “more parameters” is not a “weakness”. We emphasize, too that when weighing use of a specific (any!) model, “better” also depends (at least in part) on what the modeling effort is addressing; clearly – and regardless of the number of parameters – a “back-of-the-envelope” calculation using a simple model is sufficient if, for example, one requires only an order of magnitude estimate of the center-of-mass velocity of a migrating contaminant plume (or in other words, no need for artillery to swat a mosquito!) [In this context, quoting Albert Einstein regarding his simplification of physics into general relativity: “Everything should be made as simple as possible, but not simpler.”]

Considering chemical transport in subsurface geological formations, and the aim of quantifying (modeling) the evolution of a migrating chemical plume in both space and time, we return to focus on the ADE- and CTRW-based formulations discussed in Sect. 3.3.2. As noted in the preceding sections, CTRW formulations have been demonstrated repeatedly to describe a system effectively, with sufficient parameters to account for the various mechanisms. Most significantly, the seminal work of Scher and Montroll (1975) showed that the  $\beta$  exponent had to be included because the mean displacement was not linear with time (i.e., the mean displacement  $\bar{\ell}$  of the electron packet does not advance as  $\bar{\ell} = vt$ , but rather as  $\bar{\ell} \sim t^\beta$ ). Thus, a corresponding parameter, relative to an ADE formulation invoking Fickian transport, is unavoidable in such cases. In a sense, too, one can argue that this parameter is not an “additional” parameter relative to the ADE; rather, a decision to invoke the ADE to quantify a transport problem simply assigns a value to this parameter, implicitly, as  $\beta \geq 2$ .

It should be recognized that – while not (yet?) standard practice in the research community – quantitative model information criteria, or model selection criteria, can be used to assess and compare various model formulations that are applied to diverse scenarios (such as fluid flow, chemical transport) in subsurface geological formations. These information criteria include AIC (Akaike, 1974), AICc (Hurvich and Tsai, 1989), and KIC (Kashyap, 1982) measures, as well as the Bayesian (or Schwarz) BIC (Schwarz, 1978). They are formulated to rank models, or assign (probabilistic) posterior weights to various models in a multimodel comparative framework, and therefore focus on model parameter estimates and the associated estimation uncertainty. As such, these information criteria discriminate among various models according to (i) the ability to reproduce system behavior, and (ii) the structural complexity and number of parameters. Discussion of theoretical and applied features of these criteria is given elsewhere (e.g., Ye et al., 2008).

Specifically in the context of the ADE and CTRW formulations, with an accounting also of chemical reactions, for example, it was shown that while solution of an ADE can fit measurements from some locations quite closely, the CTRW formulation offers significantly improved predictive capabilities (in the context of model assessment in the presence of uncertainty) when examined against an entire experimental data set (Ciriello et al., 2015). In addition, focusing on the most sensitive observations associated with the CTRW model provides a stronger basis for model prediction, relative to the most sensitive observations corresponding to the ADE model.

Can you compare to make parsimonious model?

“Fitting” a RTC is not “Explaining” the process.

Values not parsimonious

Most models have simplification within parameters go away.

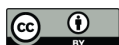

★ You introduce AIC, BUT DON'T PROVIDE ANY DATA ON HOW THE CTRW MEASURES UP BY THE METRIC. ALSO, YOU DON'T PRESENT DATA ON

874 To conclude this section: Notwithstanding the above arguments, some readers might continue  
875 to argue that the approach discussed here – viz., the need for time considerations as well as space  
876 (as embodied in the CTRW framework and related formulations) – is “inelegant” because it  
877 requires more parameters relative to the classical ADE. In response, the reader is encouraged to  
878 recall the words of Albert Einstein following criticism that his theory of gravitation was “far more  
879 complex” than Newton’s. His response was simply: “If you are out to describe the truth, leave  
880 elegance to the tailor”.

PARAMETER  
INDEPENDENT,  
OK STANDARD  
EQUATION -

881

882

#### 883 4 The holy grail of upscaling, and myths about “a priori” parameter determination

884

885 We begin by defining the term “upscaling” in the context of the discussion here on chemical  
886 transport. As defined in the Introduction, Sect. 1.2, we use the term “upscaling” to describe the  
887 effort to develop and apply chemical transport equations at large length scales, and identify  
888 corresponding model parameter values, based on measurements and parameter values obtained at  
889 significantly smaller length scales.

890 We attempt “upscaling” in the hope of developing governing equations for chemical transport  
891 at larger and larger scales, from pore, to core, to plot, and to field length scales. Clearly, then,  
892 “upscaling” is relevant to the modeling approach discussed in Sect. 3.3.2 – which focuses on use  
893 of “averaged”, or “effective” (often 1d, or section-averaged) transport equations – and not to the  
894 high-resolution domain delineation and modeling approach of Sect. 3.3.1.

895 However, in light of the discussion in Sect. 2 and Sect. 3, we argue that “upscaling” of chemical  
896 transport equations is very much a holy grail. Particularly in light of recognizing temporal effects,  
897 in addition to spatial characterization, we maintain that it is necessary to formulate, calibrate and  
898 apply models using measurements at similar scales of interest, in both space and time. Of course,  
899 similar equation formulations can be applied at different spatial scales. But parameter values for  
900 transport equations cannot generally be determined a priori or from purely spatial or flow-only  
901 measurements; *measurements with a temporal “component”, at the relevant length scale of*  
902 *interest, are required.*

903 In Sect. 4.1, we briefly discuss aspects of model calibration. This leads naturally to our  
904 discussion of upscaling in Sect. 4.2.

905

906

#### 907 4.1 Parameter determination and model calibration

908

909 First, it is prudent to offer some words about the need for parameter estimation, or model  
910 calibration. Unless one is dealing with first principles calculations of a physical process (e.g.,  
911 molecular diffusion) in a perfectly homogeneous domain, a priori determination of model  
912 parameters – for *any* model equation formulation – requires calibration against actual experimental  
913 measurements; in some limited cases, detailed numerical simulations can be used at small (pore)

PROOF?

WHAT ABOUT  
WITH CT  
SCANS?  
WOULD BE NOT  
TRUSTWORTHY, SOMETIMES  
DOY, TO ESTIMATION JARRO  
OR BECOMING?





914 scales (e.g., using an advection-diffusion equation with the fluid phase, together with solution of  
 915 the Navier-Stokes equations to first determine the precise flow field in the pore space). Indeed,  
 916 then, at any realistic problem or scale of interest, *all* chemical transport models require calibration.

917 This fundamental tenet should be clear and well-recognized, yet the literature contains all-too-  
 918 frequent – and both misguided and misleading – “criticism” of various model formulations,  
 919 claiming that “parameters are empirical because they are estimated by calibration (fitting) to  
 920 experiments”; additional “criticisms” follow, for example, that such as a model is therefore not  
 921 “universal”, and/or “it therefore has no predictive capability”. We address these latter “criticisms”  
 922 in Sect. 4.2. Parameters are *not* “empirical” simply because their values are determined by  
 923 matching to an experiment! Moreover, it should be recognized that application even of the *classical*  
 924 ADE at various column and larger scales requires estimates – obtained by calibration – of  
 925 dispersivity coefficients (and for high-resolution domain delineation and modeling as discussed in  
 926 Sect. 3.3.1, “block-scale” dispersivities are needed). [Note: And if dispersivities are not actually  
 927 determined for a specific experiment, but selected from on the literature for “typical” values of  
 928 dispersivity, there is still a reliance on calibration from previous “similar” studies.] Moreover, with  
 929 reference to the desire for model parameters that represent fundamental, *spatial* hydrogeological  
 930 properties of the domain, note that even the classical ADE dispersivity parameter is not uniquely  
 931 identified with such properties; rather, it varies even in a given domain as a function of chemical  
 932 plume travel distance or time.

933 With regard to model “universality”, recall that, for example, percolation theory (discussed at  
 934 the beginning of Sect. 2) offers “universal” exponents in scaling relationships. But even for this  
 935 type of convenient and useful, statistical model, such scaling relationships, too, can only advance  
 936 from “scaling” (e.g.,  $A \sim B$ ) to a full “equation” (e.g.,  $A = kB$ ) by calibration of a coefficient of  
 937 equality ( $k$ ) against actual measurements. So even in “simple” models, model calibration cannot  
 938 be avoided.

939 To address “empiricism” – here enters the question of whether parameters of a particular model  
 940 (in this case, equations for chemical transport) have a physical meaning. As discussed in Sect.  
 941 3.3.2, a *mechanistic-stochastic equation formulation* such as given in Eq. 4 incorporates a  
 942 probability density function to describe known transport mechanisms in a stochastic sense; but  
 943 stochastic does not mean “unphysical” and the parameters as given in, e.g., particular functional  
 944 forms of  $M(t)$  or  $\psi(t)$  are indeed physically meaningful. For example, the key  $\beta$  exponent  
 945 characterizing the power law behavior can be linked directly to the statistics of the hydraulic  
 946 conductivity field (Edery et al., 2014), or, in a fracture network, be determined from the velocity  
 947 distribution in fracture segments (Berkowitz and Scher, 1998), which is related directly to physical  
 948 properties of the domain. Similarly, corresponding parameters appearing in “subset” formulations  
 949 to quantify non-Fickian transport – e.g., mobile-immobile, multirate mass transfer, and time-  
 950 fractional derivative formulations – can be understood to have physical meaning (e.g., Dentz and  
 951 Berkowitz, 2003; Berkowitz et al., 2006). These parameters, too, of course require determination  
 952 by model calibration to experimental data (or where appropriate, to results of numerical  
 953 simulations), just as for any other model, including ADE formulations.

Kinds of the  
 definition of  
 equation



## 4.2 Upscaling, the scale of interest, and predictive capabilities

Upscaling of ~~fluid flow~~ “works” because ~~pressure propagation is essentially instantaneous~~. At the Darcy scale – which is the “practical” scale for most applications – flow paths and streamlines do not change with increasing gradient (as long as a transition to turbulent flow is not reached), the equation formulation remains valid, and the fluid residence time in a domain is irrelevant because self-diffusion of water does not affect overall fluid fluxes. [Pore-scale flow analyses are local and more specialized, and “upscaling” is not per se an objective.]

For chemical transport, though, the situation is totally different. Why? Because “upscaling” entails some kind of “coupled” averaging in both space and time, and it is far from clear how, if at all, this can be achieved. Moreover, small-scale concentration fluctuations do not necessarily “average out”, but instead propagate from local to larger spatial scales. To illustrate another aspect of the complexity, the Péclet number (Pe) in heterogeneous media, with preferential pathways, varies locally in space (recall Fig. 3 and the discussion in Sect. 3.1). Averaging to obtain a macroscale (“upscaled”) Pe must address the relative, locally varying effects of advection and diffusion in space, as well as the overall residence time in the domain; after all, it is these effects that dominate determination of the plume evolution. Thus, upscaling requires spatial averaging, but (at least an) *implicit* temporal averaging must also be included. It can be argued that no single, effective Pe can be defined for the entire domain; whether or not it is possible, and how, it is possible to average local Pe values to achieve a single, meaningful domain-scale Pe remains an open question. And whether we like it or not, even with complete information on the spatial (local) Pe distribution, the impact on the overall transport pattern evolution cannot be determined without actually solving for transport in the domain.

For chemically reactive species, the transport situation becomes even more complex, because the local residence time, not just the local Pe, must be taken into consideration. Moreover, when precipitation or dissolution processes are present, the velocity field will change locally, introducing additional local temporal and spatial variability. And when sorption is present but tapers off (when the cation exchange capacity is met, for example), even the diffusion coefficient itself changes. These factors further complicate attempts to upscale. [In this context, too, it should be noted that for chemically-reactive systems, it is well-known (e.g., White and Brantley, 2003) that there is often a significant lack of correspondence between laboratory and field-based estimates of geochemical reaction rates and rates of rock weathering, with field-scale estimates – often based on macroscopically Fickian, ADE-like transport formulations – being generally significantly smaller.]

Thus, we suggest that focusing efforts on attempting to develop upscaling methodologies for chemical transport, based on any transport equation formulation, appear to be doomed largely to failure – as evidenced, too, by decades of research publications. Rather, we argue that because of the subtle effects of temporal mechanisms, and their close coupling to spatial mechanisms, use of

“PARAMETER ZONE ADDRESSING”

— NOT TRW

← TRW

UNUSUAL HOW THIS IS OBTAINED FROM THE ABOVE.

GOOD POINT!



994 an “effective”, or “averaged” continuum-level equation to describe chemical transport (as opposed,  
 995 e.g., to intensive numerical simulation using a streamline particle tracking method in a high-  
 996 resolution hydraulic conductivity field) requires calibration of a suitable model at the appropriate  
 997 scale of interest, with model parameter values calibrated at essentially the same scale.

998 We emphasize, though, that as stated at the outset of Sect. 4, we do argue that similar  
 999 (continuum-level) transport equation *formulations* can be applied at different spatial scales, as long  
 1000 as they are mechanistically correct (with a *temporal* component), and the parameter values are  
 1001 based on *measurements at the relevant length scale of interest*.

1002 Now, in the context of the above arguments regarding “upscaling” and model application, we  
 1003 return to the ideas presented in Sect. 3.3.2 and consideration of model formulations that account  
 1004 for both spatial and temporal effects. We first mention use of the ADE. As pointed out in Sect. 3.2  
 1005 and extensive literature, the “constant” (as required by the ADE formulation) “intrinsic”  
 1006 dispersivity parameter changes significantly even over relatively small (e.g., 10’s of cm’s, Silliman  
 1007 and Simpson, 1987) increases in length – and therefore also time – scales, so that it makes no real  
 1008 sense to attempt to define an “upscaled” dispersivity parameter for larger scales. Even in the  
 1009 framework of high-resolution domain delineation and modeling, discussed in Sect. 3.3.1 – which  
 1010 is not “upscaling” as defined here – the question remains as to what dispersivity values are relevant  
 1011 for field-scale aquifer “blocks” of the order of 100 to 1000’s of m<sup>3</sup>.

1012 In contrast, CTRW and related transport formulations with explicit accounting of time effects,  
 1013 as outlined in Sect. 3.3.2, can be applied meaningfully to interpret real measurements and transport  
 1014 behavior at “all” scales. We *can* use the same equation formulation at different scales, with  
 1015 different but relevant parameters at each scale. We emphasize, too, that we do not argue for “hard”  
 1016 length scales, so that in principle, e.g., an appropriate (CTRW-based) model calibrated at 20 cm  
 1017 will be applicable to 100 cm scales, and that a model calibrated on a 100 m scale data set can be  
 1018 applicable at a kilometer scale. The point, though, is that it makes no sense to calibrate at a  
 1019 centimeter scale and then expect to somehow “upscale” parameters to apply the same model at a  
 1020 kilometer scale. [Note: As an aside, over very large field-length and field-time scales, we point out  
 1021 that homogenization effects of molecular diffusion *may* become more significant, lessening  
 1022 impacts of some preferential pathways.] Similarly, a CTRW-based approach can be applied over  
 1023 a range of *time* scales, because the power law accounting for temporal effects can be as broad as  
 1024 needed. In these cases, temporal effects are critical, because at the continuum (Darcy) scale,  
 1025 streamlines do not change but residence times do. Specifically, for example, a model formulation  
 1026 with a fixed set of parameters can interpret transport measurements in the same domain, but  
 1027 acquired under different hydraulic gradients (fluid velocities), and thus domain residence times  
 1028 (Berkowitz and Scher, 2009). Indeed, because of the temporal accounting, CTRW has been applied  
 1029 successfully over scales from pores (e.g., Bijeljic et al., 2013) to kilometers (e.g., Goeppert et al.,  
 1030 2020), with parameter calibration at the relevant scale of interest. In principle then, too, a calibrated  
 1031 model shown to be effective/meaningful over one region of a porous medium or geological  
 1032 formation can offer at least a reasonable estimate of transport behavior elsewhere in the  
 1033 medium/formation, at a similar length/time scale, and as long as the medium/formation can be

★  
 THE OUTSET  
 IS SAYING THAT  
 NO FIELD SCALES  
 CAN BE  
 APPROXIMATED  
 TO ANY CONTINUUM  
 TIME, VELOCITY,  
 SPACED  
 SCALES.

ON WHAT  
 BASIS DO YOU  
 SAY THIS?  
 ANY PAPER ON  
 SCALING BEHAVIOR  
 OF PARAMETERS?



expected to have reasonably similar hydrogeological structure and properties.

And finally, another critical aspect must be pointed out with regard to *continuum-scale* transport models as outlined in Sect. 3.2. The preceding discussion leads to the stated need and desire – at least in principle – to achieve model “prediction”. This term appears often, but it is often used incorrectly. Fitting a model solution to data is of course not “prediction”. On one hand, using specific experiments and data sets, models can be used to *characterize* transport behavior, e.g., is transport Fickian or non-Fickian?, or, is a migrating chemical plume compact or elongated and ramified?, which is of fundamental importance. But if *prediction* is the ultimate goal (recognizing that addressing *prediction uncertainty* is yet another consideration), then we require multiple data sets from the same porous medium or geological formation, in the sense that we need measurements over a range of length scales, and/or over a range of time scales (i.e., same distance, different flow rates). An intended model can then be calibrated against one part of the data set; the calibrated model is then applied “as is” and the resulting solution (“prediction”) is compared against other (“previously unknown”) measurements. At the laboratory scale, such a protocol is feasible, but rarely executed. Rather, the literature generally reports fits of transport equation solutions *at specific scales* (individual data sets at a given length scale), and not over a range of scales, so that no real testing of “upscaling” or “prediction” is achieved. Thus, even at laboratory scales, true “predictive capability” of a model is rarely examined or reported. [Note: A similar approach to “prediction” can be done in a purely numerical/computational study, using “ground truth simulations” that are *assumed* correct (e.g., Darcy flow calculations and then streamline particle tracking for chemical transport in a highly-resolved domain; recall Sect. 3.3.1), and then comparing solutions from a continuum (e.g., partial differential equation) model solution. But it should be recognized that results from *assumed* simulation methods are often unsatisfactory when compared against experimental measurements and field observations.]

And at the field scale, the situation is even less satisfying; large-scale field tests for chemical transport are difficult and expensive to execute, so that systematic data sets that enable testing of model “prediction” are essentially non-existent. Moreover, at the field scale, there are necessarily highly limited numbers of measurements, so that oft-used (and non-unique) interpolation of sparse concentration measurements employed to yield (ideally 3d) contour maps of concentration will unrealistically smooth and dampen non-uniform, ramified and irregular preferential pathways (recall Fig. 2). Thus, notwithstanding the extensive research efforts reported in the literature, truly comparative studies using field measurements – to genuinely test proposed “upscaling” methodologies – are essentially non-existent (e.g., Berkowitz et al., 2016)! In this context, then, we note that criticism in the literature that a given continuum model “demonstrates no predictive capability” is in fact not generally based on its assessment relative to sufficiently resolved, representative, and real data sets.

Finally, it is important to recognize that models are most commonly tested against 1d, section-averaged concentration breakthrough curves, which can be (i) measured directly in laboratory column experiments, (ii) estimated or derived in 2d/3d laboratory flow cells by averaging over control planes, or (iii) estimated from limited monitoring well measurements (single or multi-level



sampling with depth) at a fixed number of locations. The latter case, in particular, requires extensive interpolation and/or assumption of a large-scale, essentially 1d and uniform, macroscopic flow field. Moreover, chemical transport model discrimination often requires breakthrough curves that extend over the late time tailing, which are particularly difficult to determine in field conditions, due both to interruptions or lack of practicality in well monitoring at long times, and to detection limits of measurement methods. While reliance on such 1d (section averaged, over some control plane) breakthrough curves may not be ideal, it is *reality* in terms of feasible data acquisition. As a direct consequence, model selection, model parameter fits, and model calibration results may each (and all) be non-unique and lead to confusing or conflicting conclusions. It is therefore critical that we at least select from mechanistic-stochastic models based on fundamental laws of physics, with parameters that have physical meaning, as discussed in Sect. 3.3.2, rather than from models invoking purely statistical distributions or assumptions known to be incorrect.

## 5 Concluding remarks

The ideas, arguments and perspectives offered here represent an effort to somehow summarize and synthesize understanding of existing approaches and methods proposed to quantify chemical transport in subsurface hydrological systems. The literature on this subject is vast, extending over decades, and measurements and observations of chemical transport range from pore-scale microfluidic laboratory cells to aquifer field scales. A similarly broad range of model formulations has been proposed to quantify and interpret these measurements/observations. And yet, outcomes of these efforts are often largely unsatisfactory.

We contend that modeling obstacles arise largely because domain heterogeneity – in terms of porosity, hydraulic conductivity, and geochemical properties – is present over multiple length scales, so that “unresolved”, practically unmeasurable heterogeneities and preferential pathways arise at every length scale. Moreover, while *spatial* averaging approaches are effective when considering overall fluid flow – wherein pressure propagation is essentially instantaneous and the system is “well mixed” – purely *spatial* averaging approaches are far less effective for chemical transport, essentially because well-mixed conditions do not prevail. We assert here that an explicit accounting of *temporal* information, under uncertainty, is an additional – but *fundamental* – component in an effective modeling formulation. As a consequence, we argue that for continuum-scale analysis, mechanistic-stochastic models such as those outlined in Sect. 3.2 must be invoked to account explicitly for both “additional” temporal effects and unresolved heterogeneity. Clearly, no single model is “best” for all situations and objectives, but any selected model must be physically relevant and justified.

We further assert, as an outcome of these arguments, that “upscaling” of chemical transport equations – in the sense of attempting to develop and apply chemical transport equations at large (length) scales based on measurements and model parameter values obtained at significantly

his own, not properly.



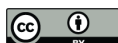

— ON UNATTAINABLE OBJECTIVE  
 ("Holy Grail")

1114 smaller length scales – is very much a ~~holy~~ ~~grail~~. Rather, because probabilistic considerations  
 1115 required to account for small-scale fluctuations do not necessarily “average out” (and can  
 1116 propagate from local to larger spatial scales), we maintain that it is necessary to formulate, calibrate  
 1117 and apply models using measurements at similar scales of interest, in both space and time.

1118 In all of our efforts to reasonably model chemical transport in subsurface hydrological systems,  
 1119 we should recognize and accept the objective of advancing our science by integrating theory,  
 1120 computational techniques, laboratory experiments and field measurement, with the aim of  
 1121 extracting broadly applicable insights and establishing practical, functional tools. In this context,  
 1122 as a close colleague and mentor said to me many, many years ago, “remember, this is hydrology,  
 1123 with very real problems to address...we’re not doing string theory”!

INCLUDE THE  
 FULL BREADTH OF  
 MODEL / FORMULATIONS

1124 We have included many points for discussion and open thought. The reader may not agree with  
 1125 all arguments and conclusions raised here, but scholarly debate is critical: it is hoped that this  
 1126 contribution will stimulate further discussion, assist in ordering classification of the (often  
 1127 confusing) terminologies and considerations, and identify the most relevant, real questions for  
 1128 analysis, implementation and future research.

1129 We hope that the above thoughts and illustrations (i) encourage careful consideration prior to  
 1130 data collection (whether from field measurements, laboratory experiments, and/or numerical  
 1131 simulations), (ii) assist in experimental design and subsequent analysis, and, even more  
 1132 significantly, (iii) influence the research agenda for the field by challenging researchers to ask and  
 1133 address appropriately formulated questions. In terms of “modeling” efforts: recall the statement  
 1134 by Manfred Eigen (Nobel prize chemistry, 1967): “A theory has only the alternative of being right  
 1135 or wrong. A model has a third possibility: it may be right, but irrelevant.”

1136  
 1137  
 1138 *Data availability.* All data have been reported and published previously, as given in the relevant citations.  
 1139

1140 *Author contributions.* Single author contribution.  
 1141

1142 *Competing interests.* The author is a member of the editorial board of Hydrology and Earth System  
 1143 Sciences. The peer-review process was guided by an independent editor, and the author has  
 1144 no other competing interests to declare.

1145  
 1146 *Acknowledgements.* This contribution has emanated from research and discussions – often animated and  
 1147 always thought-provoking – with students, post-doctoral fellows, and more senior colleagues in my group  
 1148 and from around the world, over the last two decades. I am deeply grateful to them all! I also appreciate  
 1149 critical insights and constructive comments by Alberto Guadagnini and Harvey Scher. ~~B.B. holds the Sam~~  
 1150 ~~Zuckerberg Professorial Chair in Hydrology.~~

THOSE ?

## 1151 1152 1153 References

- 1154  
 1155 Akaike, H.: A new look at statistical model identification, IEEE Trans. Autom. Control, 19, 716–723,  
 1156 1974, doi:10.1109/TAC.1974.1100705.  
 1157 Andrade, J. S., Costa, U. M. S., Almeida, M. P., Makse, H. A., and Stanley, H. E.: Inertial effects on fluid  
 1158 flow through disordered porous media, Phys. Rev. Lett., 82, 5249, 1999,

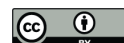

- 1159 <https://doi.org/10.1103/PhysRevLett.82.5249>.
- 1160 Aronofsky, J. S., and Heller, J. P.: A diffusion model to explain mixing of flowing miscible fluids in  
 1161 porous media, *Trans. Am. Inst. Min. Metall. Pet. Eng.*, 210, 345–349, 1957.
- 1162 Berkowitz, B.: Analysis of fracture network connectivity using percolation theory, *Math. Geol.*, 27, 467–  
 1163 483, 1995, <https://doi.org/10.1007/BF02084422>.
- 1164 Berkowitz, B. and Scher, H.: Theory of anomalous chemical transport in fracture networks, *Physical*  
 1165 *Review E*, 57(5), 5858–5869, 1998, <https://doi.org/10.1103/PhysRevE.57.5858>.
- 1166 Berkowitz, B. and Scher, H.: Exploring the nature of non-Fickian transport in laboratory experiments,  
 1167 *Advances in Water Resources*, 32, 750–755, 2009, doi:10.1016/j.advwatres.2008.05.004.
- 1168 Berkowitz, B., Cortis, A., Dentz, M., and Scher H.: Modeling non-Fickian transport in geological  
 1169 formations as a continuous time random walk, *Rev. Geophys.*, 44, RG2003, 2006,  
 1170 <https://doi.org/10.1029/2005RG000178>.
- 1171 Berkowitz, B., Dror, I., Hansen, S. K., and Scher, H.: Measurements and models of reactive transport in  
 1172 geological media, *Rev. Geophys.*, 54, 930–986, 2016, doi:10.1002/2016RG000524.
- 1173 Bianchi, M., Zheng, C., Wilson, C., Tick, G. R., Liu, G., and Gorelick, S. M.: Spatial connectivity in a  
 1174 highly heterogeneous aquifer: From cores to preferential flow paths, *Water Resour. Res.*, 47(5),  
 1175 W05524, 2011, <https://doi.org/10.1029/2009WR008966>.
- 1176 Bijeljic, B., Raeini, A., Mostaghimi, P., and Blunt, M. J.: Predictions of non-Fickian solute transport in  
 1177 different classes of porous media using direct simulation on pore-scale images, *Phys. Rev. E*, 87(1),  
 1178 013011, 2013, <https://link.aps.org/doi/10.1103/PhysRevE.87.013011>.
- 1179 Ciriello, V., Edery, Y., Guadagnini, A. and Berkowitz, B.: Multimodel framework for characterization of  
 1180 transport in porous media, *Water Resour. Res.*, 51, 3384–3402, 2015. doi:10.1002/2015WR017047.
- 1181 Dai, C., Xue, L., Zhang, D., and Guadagnini, A.: Data-worth analysis through probabilistic collocation-  
 1182 based ensemble Kalman filter, *J. Hydrol.*, 540, 488–503, 2016,  
 1183 <https://doi.org/10.1016/j.jhydrol.2016.06.037>.
- 1184 Dentz, M. and Berkowitz, B.: Transport behavior of a passive solute in continuous time random walks  
 1185 and multirate mass transfer, *Water Resour. Res.*, 39(5), 1111, 2003,  
 1186 <https://doi.org/10.1029/2001WR001163>.
- 1187 Edery, Y., Guadagnini, A., Scher, H., and Berkowitz, B.: Origins of anomalous transport in disordered  
 1188 media: Structural and dynamic controls, *Water Resour. Res.*, 50, 1490–1505,  
 1189 2014, <https://doi.org/10.1002/2013WR015111>.
- 1190 Eggleston, J., and Rojstaczer, S.: Identification of large-scale hydraulic conductivity trends and the  
 1191 influence of trends on contaminant transport, *Water Resour. Res.*, 34, 2155–2168,  
 1192 1998, <https://doi.org/10.1029/98WR01475>.
- 1193 Einstein, A.: Über die von der molekulartheoretischen Theorie der Wärme geforderte Bewegung von in  
 1194 ruhenden Flüssigkeiten suspendierten Teilchen, *Ann. Phys. Leipzig*, 17, 549–560, 1905,  
 1195 <https://doi.org/10.1002/andp.19053220806>.
- 1196 Gelhar, L. W. and Axness, C. L.: Three-dimensional stochastic analysis of macrodispersion in aquifers,  
 1197 *Water Resour. Res.*, 19(1), 161–180, 1983, <https://doi.org/10.1029/WR019i001p00161>.
- 1198 Goepfert, N., Goldscheider N., and Berkowitz, B.: Experimental and modeling evidence of kilometer-  
 1199 scale anomalous tracer transport in an alpine karst aquifer, *Water Res.*, 178, 115755, 2020,  
 1200 doi:10.1016/j.watres.2020.115755.
- 1201 Hansen, S. K. and Berkowitz, B.: Interpretation and nonuniqueness of CTRW transition distributions:  
 1202 Insights from an alternative solute transport formulation, *Adv. Water Resour.*, 74, 54–63, 2014,  
 1203 <http://dx.doi.org/10.1016/j.advwatres.2014.07.011>.
- 1204 Hansen, S. K. and Berkowitz, B.: Aurora: A non-Fickian (and Fickian) particle tracking package for  
 1205 modeling groundwater contaminant transport with MODFLOW, *Environ. Model. Softw.*, 134,  
 1206 104871, 2020, doi:10.1016/j.envsoft.2020.104871.
- 1207 Hurvich, C. M. and Tsai, C.-L.: Regression and time series model selection in small samples, *Biometrika*,  
 1208 76(2), 297–307, 1989. <https://doi.org/10.1093/biomet/76.2.297>
- 1209 Kashyap, R. L.: Optimal choice of AR and MA parts in autoregressive moving average models, *IEEE*



no le Bouye!

- 1210 Trans. Pattern Anal., 4(2), 99–104, 1982, doi:10.1109/tpami.1982.4767213.
- 1211 Levy, M. and Berkowitz, B.: Measurement and analysis of non-Fickian dispersion in heterogeneous
- 1212 porous media, J. Contam. Hydrol., 64(3–4), 203–226, 2003, https://doi.org/10.1016/S0169-
- 1213 7722(02)00204-8.
- 1214 Margolin, G., Berkowitz, B. and Scher, H.: Structure, flow, and generalized conductivity scaling in
- 1215 fracture networks, Water Resour. Res., 34(9), 2103–2121, 1998, https://doi.org/10.1029/98WR01648.
- 1216 Maina, F. H., Ackerer, P., Younes, A., Guadagnini, A., and Berkowitz, B.: Benchmarking numerical
- 1217 codes for tracer transport with the aid of laboratory-scale experiments in 2D heterogeneous porous
- 1218 media, J. Contam. Hydrol., 212, 55–64, 2018, https://doi.org/10.1016/j.jconhyd.2017.06.001.
- 1219 Maples, S. R., Fogg, G. E., and Maxwell, R. M.: Modeling managed aquifer recharge processes in a
- 1220 highly heterogeneous, semi-confined aquifer system, Hydrogeol. J., 27, 2869–2888, 2019,
- 1221 https://doi.org/10.1007/s10040-019-02033-9.
- 1222 Nissan, A. and Berkowitz, B.: Anomalous transport dependence on Péclet number, porous medium
- 1223 heterogeneity, and a temporally-varying velocity field, Phys. Rev. E, 99, 033108, 2019,
- 1224 https://doi.org/10.1103/PhysRevE.99.033108.
- 1225 Nissan, A., Dror, I., and Berkowitz, B.: Time-dependent velocity-field controls on anomalous chemical
- 1226 transport in porous media, Water Resour. Res., 53, 3760–3769, 2017,
- 1227 https://doi.org/10.1002/2016WR020143.
- 1228 Nissan, A. and Berkowitz, B.: Inertial effects on flow and transport in heterogeneous porous media, Phys.
- 1229 Rev. Lett., 120, 054504, 2018, https://doi.org/10.1103/PhysRevLett.120.054504.
- 1230 Rizzo, C. B., and de Barros, F. P. J.: Minimum hydraulic resistance and least resistance path in
- 1231 heterogeneous porous media, Water Resour. Res., 53, 8596–8613, 2017,
- 1232 https://doi.org/10.1002/2017WR020418.
- 1233 Scheidegger, A. E.: An evaluation of the accuracy of the diffusivity equation for describing miscible
- 1234 displacement in porous media, in: Proc. Theory Fluid Flow Porous Media 2nd Conf., 1959, Univ.
- 1235 Oklahoma, Norman, Oklahoma, USA, 101–116, 1959.
- 1236 Scher, H., and Lax, M.: Stochastic transport in a disordered solid. I. Theory, Phys. Rev. B, 7, 4491–4502,
- 1237 1973, https://doi.org/10.1103/PhysRevB.7.4491.
- 1238 Scher, H., and Montroll, E. W.: Anomalous transit time dispersion in amorphous solids, Phys. Rev. B, 12,
- 1239 2455–2477, 1975, https://doi.org/10.1103/PhysRevB.12.2455.
- 1240 Schwarz, G.: Estimating the dimension of a model. Ann. Stat., 6, 461–464, 1978,
- 1241 https://www.jstor.org/stable/2958889.
- 1242 Shlesinger, M. F.: Asymptotic solutions of continuous-time random walks, J. Stat. Phys., 10(5), 421–434,
- 1243 1974, https://doi.org/10.1007/BF01008803.
- 1244 Silliman, S. E., and Simpson, E. S.: Laboratory evidence of the scale effect in dispersion of solutes in
- 1245 porous media, Water Resour. Res., 23(8), 1667–1673, 1987,
- 1246 https://doi.org/10.1029/WR023i008p01667.
- 1247 Smoluchowski, M. M.: Essai d'une théorie cinétique du mouvement Brownien et des milieux troubles
- 1248 [Test of a kinetic theory of Brownian motion and turbid media]. Bulletin International de l'Académie
- 1249 des Sciences de Cracovie (in French): 577, 1906a.
- 1250 Smoluchowski, M.: Zur kinetischen Theorie der Brownschen Molekularbewegung und der Suspensionen.
- 1251 Annalen der Physik (in German). 326(14), 756–780, 1906b, doi:10.1002/andp.19063261405.
- 1252 Stauffer, D. and Aharony, A.: Introduction to Percolation Theory, 2nd Ed. Taylor & Francis, London,
- 1253 1994, 181 pp.
- 1254 Thovert, J.-F. and Adler, P. M.: Grain reconstruction of porous media: Application to a Bentheim
- 1255 sandstone, Phys. Rev. E, 83(5), 056116, 2011, https://link.aps.org/doi/10.1103/PhysRevE.83.056116.
- 1256 White, A. F., and Brantley, S. L.: The effect of time on the weathering of silicate minerals: Why do
- 1257 weathering rates differ in the laboratory and field?, Chem. Geol., 202(3–4), 479–506, 2003,
- 1258 https://doi.org/10.1016/j.chemgeo.2003.03.001.
- 1259 Ye, M., Meyer, P. D., and Neuman, S. P.: On model selection criteria in multimodel analysis, Water
- 1260 Resour. Res., 44, W03428, 2008, https://doi.org/10.1029/2008WR006803.
